# ***Resistance to dieldrin* evolution in African malaria vectors is driven by interspecific and interkaryotypic introgression**

Xavier Grau-Bové<sup>1</sup>, Sean Tomlinson<sup>1,2</sup>, Andrias O. O'Reilly<sup>3</sup>, Nicholas J. Harding<sup>4</sup>, Alistair Miles<sup>4,5</sup>, Dominic Kwiatkowski<sup>4,5</sup>, Martin J. Donnelly<sup>1,5</sup>, David Weetman<sup>1</sup>, The Anopheles gambiae 1000 Genomes Consortium<sup>6</sup>

1. Department of Vector Biology, Liverpool School of Tropical Medicine, Liverpool, United Kingdom

2. Centre for Health Informatics, Computing and Statistics, Lancaster University, Lancaster,

3. School of Biological and Environmental Sciences, Liverpool John Moores University, Liverpool, UK

4. Big Data Institute, University of Oxford, Li Ka Shing Centre for Health Information and Discovery, United Kingdom

5. Wellcome Sanger Institute, Hinxton, United Kingdom

6. <https://www.malariagen.net/projects/ag1000g#people>

## **Abstract**

The evolution of insecticide resistance mechanisms in natural populations of *Anopheles* malaria vectors is a major public health concern across Africa. Using genome sequence data, we study the evolution of resistance mutations in the *resistance to dieldrin* gene (*Rdl*), a GABA receptor targeted by several insecticides, but most notably by the long-discontinued cyclodiene, dieldrin. The two *Rdl* resistance mutations (*296G* and *296S*) spread across West and Central African *Anopheles* via two independent hard selective sweeps that included likely compensatory nearby mutations, and were followed by a rare combination of introgression across species (from *A. gambiae* and *A. arabiensis* to *A. coluzzii*) and across non-concordant karyotypes of the 2La chromosomal inversion. *Rdl* resistance evolved in the 1950s as the first known adaptation to a large-scale insecticide-based intervention, but the evolutionary lessons from this system highlight contemporary and future dangers for management strategies designed to combat development of resistance in malaria vectors

# Introduction

The recurrent evolution of insecticide resistance in the highly-variable genomes of *Anopheles* mosquitoes [1–3] is a major impediment to the ongoing efforts to control malaria vector populations. Resistance to dieldrin was the first iteration of this cyclical challenge: this organochlorine insecticide was employed in a pioneering vector control programme in Nigeria in 1954, but resistant *Anopheles* had already appeared after just 18 months [4] due to a single dominant mutation [5,6]. Dieldrin use ceased in the 1970s due to its high persistence as an organic pollutant and unexpectedly wide toxicity, culminating in a ban in the 2001 Stockholm Convention on Persistent Organic Pollutants. However, resistance has remained strikingly persistent in natural *Anopheles* populations for more than 40 years [7]. The study of the genetic architecture of dieldrin resistance can thus provide key insights into the evolutionary ‘afterlife’ of resistance mechanisms to legacy insecticides. We address this issue by studying its emergence and dissemination in contemporary African populations of the *A. gambiae* species complex.

Dieldrin resistance in *Anopheles spp.* is caused by mutations in its target site, the  $\gamma$ -aminobutyric (GABA) receptor gene – also known as *resistance to dieldrin locus*, or *Rdl* [7–9]. Two resistance mutations have been found in anophelines, both in *Rdl* codon 296 (equivalent to codon 302 in *Drosophila* [7]): alanine-to-glycine (*A296G*) and alanine-to-serine (*A296S*). Populations of *Anopheles gambiae* sensu stricto (henceforth, *A. gambiae*) and its sister species *A. coluzzii* possess both *296G* and *296S* alleles [7,10], whereas the *296S* allele is the only one reported in *A. arabiensis* and the more distantly-related malaria vectors *A. funestus* and *A. sinensis* [7,11,12]. Normally, dieldrin inhibits the activity of *Rdl* receptors, causing persistent neuronal excitation and rapid death; but codon 296 mutations confer resistance by reducing its sensitivity to the insecticide [13]. However, in the absence of exposure, *Rdl* mutations appear to carry fitness costs, such as lower mosquito mating success [14] or impaired response to oviposition and predation-risk signals [15,16] (although see [17]). Consequently, with seemingly limited current benefit via exposure to insecticides targeting *Rdl*, persistence of the mutations in anophelines is puzzling.

We interrogate the *Anopheles gambiae* 1000 Genomes cohort [3,18] to ascertain how often dieldrin resistance mutations have evolved in the *A. gambiae/A. coluzzii* species pair, and the mechanisms by which these alleles spread across Africa and may persist. We identify two distinct *Rdl* resistance haplotypes in these species, defined by hard selective sweeps and the perfect linkage of the *296G* and *296S* alleles with putatively compensatory mutations. Furthermore, the resistance haplotypes are across genomes from different species (*A. gambiae*, *A. coluzzii* and *A. arabiensis*), and across chromosomes with differing karyotypes in the 2La inversion (the longest inversion in *Anopheles* genomes) [19] within which *Rdl* resides. Inter-species reproductive isolation and inversions such as 2La both result in reduced recombination rates [20–23], which would in principle hinder the spread of these adaptive alleles. Here, we provide evidence that *Rdl* resistance alleles, which our structural modelling shows have divergent effects on the channel

66 pore, underwent a rare combination of interspecific and interkaryotypic introgression.

Overall, we show that two founding resistance mutations spread with remarkable ease across  
68 geographical distance, species, and recombination barriers. This evolutionary trajectory has  
parallels with later-emerging target site resistance mutations, such as *Vgsc* [24–27]. The  
70 persistence of dieldrin resistance also challenges the efficacy of current and newly developed  
insecticides that also target *Rdl* [28–30], as well as the efficacy of rotative insecticide management  
72 strategies [31]. These results thus emphasise the influence of past interventions on current and  
future programmes of vector population control.

## 74 Results

### Distribution of *Rdl* resistance mutations across African populations

76 First, we investigated the genetic variation in *Rdl* across populations of the *Anopheles gambiae*  
species complex, including *A. gambiae* and *A. coluzzii* from the *Anopheles gambiae* 1000 genomes  
78 project (Ag1000G Phase 2,  $n = 1142$ ) [3], and outgroups from four other species (*A. arabiensis*, *A.*  
*quadriannulatus*, *A. melas* and *A. merus*;  $n = 36$ ) [32]. All genomes and their populations of origin are  
80 listed in Supplementary Material SM1.

**A) *Rdl* non-synonymous mutations**

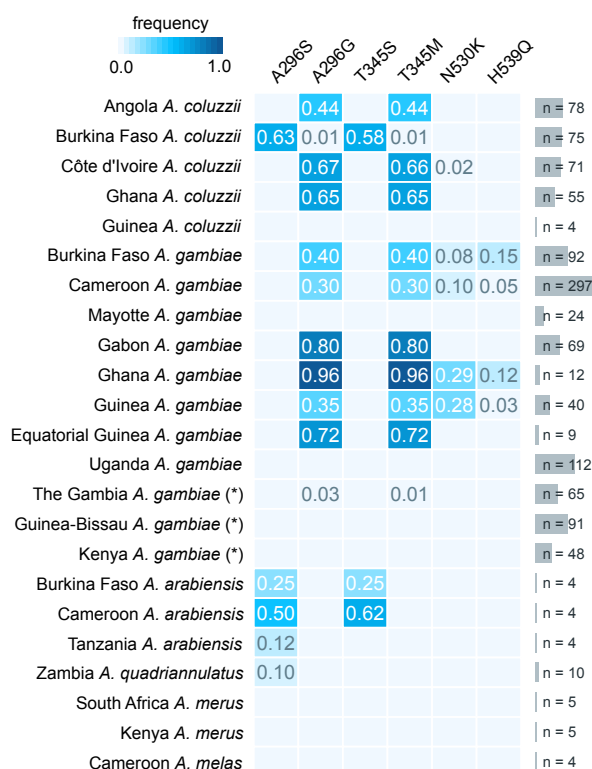

**B) Genotypes in *Rdl* codon 296**

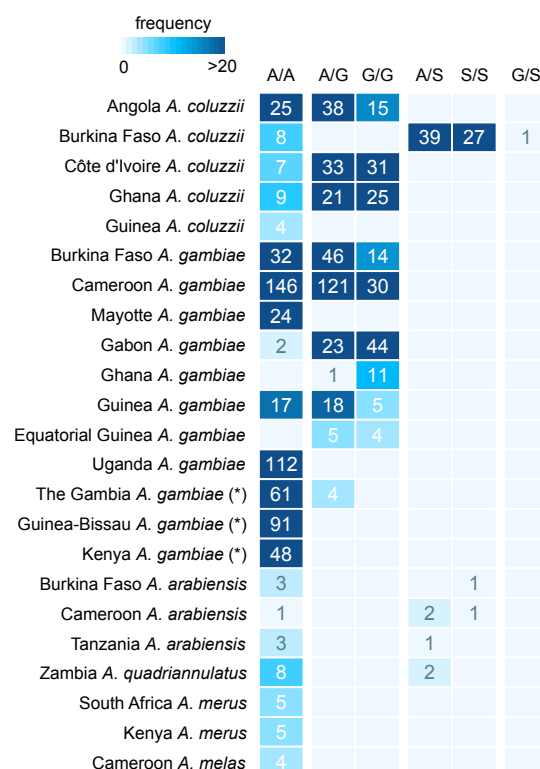

**Figure 1. *Rdl* mutations. A)** Frequency of non-synonymous mutations in *Rdl* across populations of *A. gambiae*, *A. coluzzii* (Ag1000G Phase 2) and *A. arabiensis*. Only variants with >5% frequency in at least one population are included. **B)** Distribution of genotypes for the two mutations in codon 296 (A296S and A296G). Note: *A. gambiae* populations denoted with an asterisk (The Gambia, Guinea-Bissau and Kenya) have high frequency of hybridisation and/or unclear species identification (see Methods).

We identified six non-synonymous mutations that are segregating in at least one population at  $\geq 5\%$  frequency (Figure 1A; complete list of variants in Supplementary Material SM2), including the 296G and 296S resistance alleles. 296G is present in West and Central African populations of both *A. gambiae* and *A. coluzzii*, with frequencies ranging from 30% (Cameroon *A. gambiae*) to 96% (Ghana *A. gambiae*). 296S is present in *A. coluzzii* specimens from Burkina Faso (63%), as well as *A. arabiensis* (Burkina Faso, Cameroon, Tanzania) and *A. quadriannulatus* (Zambia). Resistance alleles occur as both homozygotes or heterozygotes in all species except *A. quadriannulatus*, which is always heterozygous (Figure 1B).

We also identified two mutations in codon 345 with very similar frequencies to those of each codon 296 mutation: T345M (C-to-T in the second codon position), co-occurring with A296G; and T345S (A-to-T in the first codon position), co-occurring with A296S. The high degree of linkage disequilibrium between genotypes in codons 296 and 345 confirmed that they were co-occurring in the same specimens (Figure 2; e.g., the 296G/345M allele pair had a Huff and Rogers  $r$  and Lewontin's  $D' = 1$ ), and was apparent in all individual populations where the alleles were present (Supplementary Material SM3). Codons 296 and 345 are located in the 7th and 8th exons of *Rdl*, separated by 3935 bp; and they map to the second and third transmembrane domains of the RDL protein, respectively (Supplementary Material SM4).

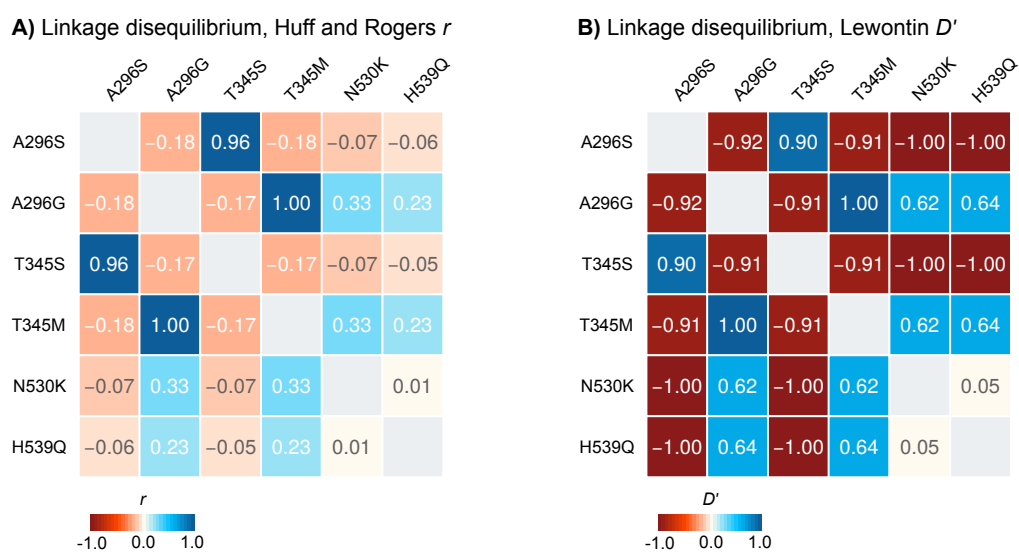

**Figure 2. Linkage disequilibrium.** Linkage disequilibrium between non-synonymous mutations in *Rdl*, calculated using Huff and Rogers'  $r$  (A) and Lewontin's  $D'$  (B).

## 100 *Rdl* resistance mutations evolved on two unique haplotypes in *A. gambiae* and *A. coluzzii*

The high frequency of the 296S and 296G alleles in various populations of *A. gambiae* and *A. coluzzii* (Figure 1), together with their co-occurrence with nearby mutations (Figure 2), were suggestive of a selective sweep driven by positive selection on the resistance alleles. To clarify this possibility, we inspected the similarity of haplotypes in *A. gambiae*, *A. coluzzii* and the four outgroup species ( $n = 2356$  haplotypes) using a minimum spanning network based on 626 phased variants located

10,000 bp upstream and downstream of codon 296 (Figure 3).

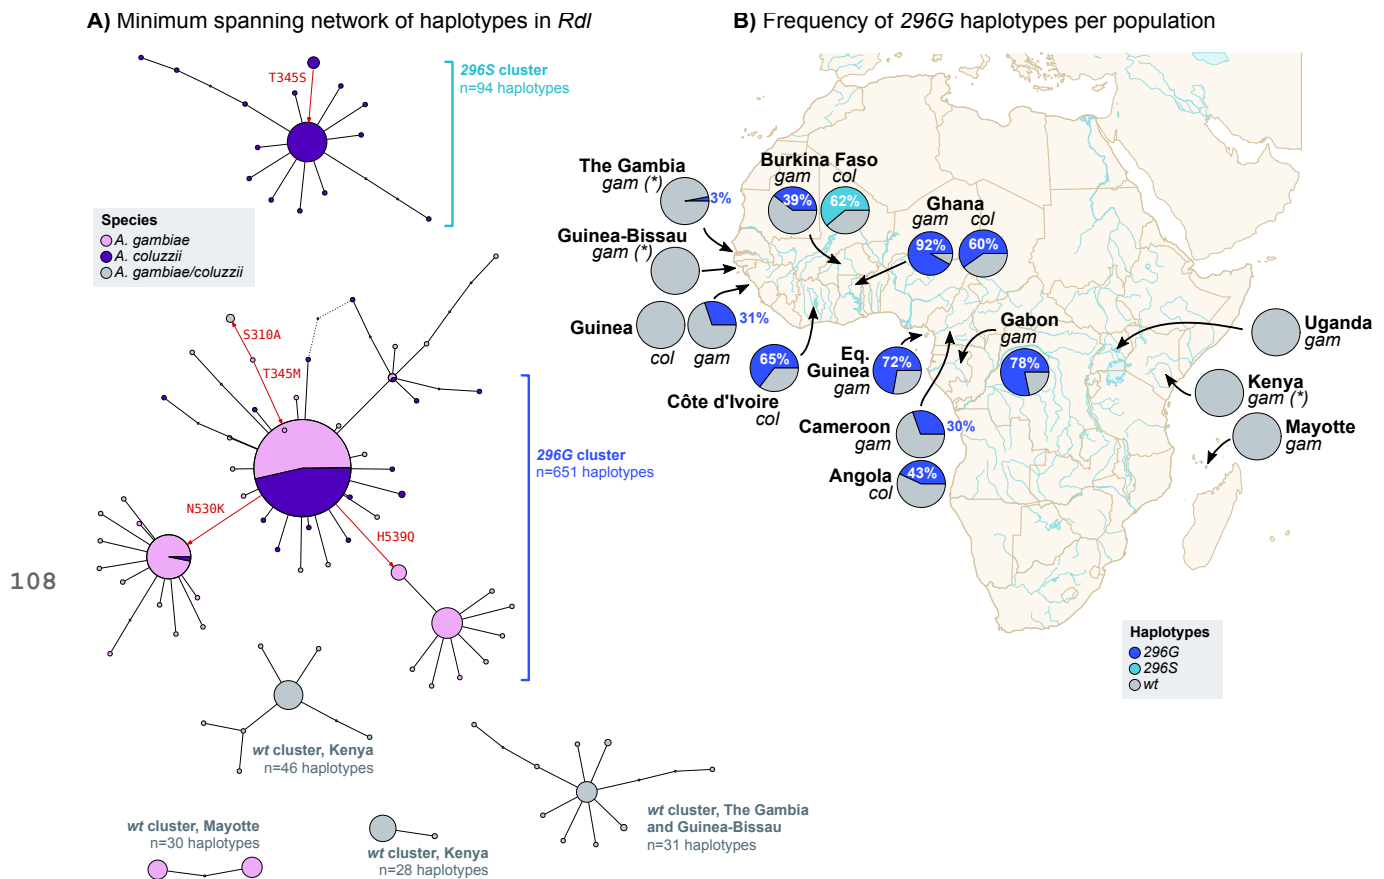

**Figure 3. *Rdl* haplotypes.** **A)** Minimum spanning network of haplotypes around *Rdl* codon 296 (626 phased variants located +/- 10,000 bp from the 2L:25429236 position). Only haplotype clusters with a frequency >1% in the cohort are represented (complete networks available as Supplementary Material SM6). Each node in the network is color-coded according to its species composition. Haplotype clusters carrying the resistance alleles 296G and 296S are highlighted in blue. Red arrows indicate the direction of non-synonymous mutations (relative to reference genome). **B)** Frequency of resistance haplotypes per population. Detailed frequencies with absolute counts in Supplementary Material SM14. Note: *gam*=*A. gambiae*, *col*=*A. coluzzii*; *gam* populations denoted with an asterisk have unclear species identification and/or high rates of hybridisation.

We identified two distinct groups of haplotypes associated with resistance mutations. First, the 296G cluster contained haplotypes sharing the 296G/345M alleles which were widely distributed in Central and West Africa (11 populations of *A. coluzzii* and *A. gambiae*; *n* = 651 haplotypes). The 296G group showed two sub-clusters associated with the downstream mutations N530K and H539Q (red arrows in Figure 3A), which were present in a subset of mostly *A. gambiae* populations (Guinea, Ghana, Burkina Faso and Cameroon; Figure 1A); with just a few *A. coluzzii* from Côte d'Ivoire in the N530K cluster. Both N530K and H539Q are in partial linkage disequilibrium with 296G alleles (Figure 2).

In contrast, the 296S cluster, defined by ubiquitous co-occurrence of the 296S/345S allele pair, was restricted to *A. coluzzii* from Burkina Faso (*n* = 94; Figure 3A, B), whereas the *A. arabiensis* and *A. quadriannulatus* 296S haplotypes appeared as distantly related singletons (not visible on Figure 3, see Supplementary Material SM5 and SM6). We also found four smaller wild-type clusters (296A



allele; henceforth *wt*) that are specific to other geographical locations (Kenya, Mayotte, and The  
 122 Gambia/Guinea-Bissau). The remaining haplotypes are also *wt* and group in smaller clusters or  
 singletons with frequencies <1% in the dataset ( $n = 1476$ , 62.6% of all examined haplotypes;  
 124 Supplementary Material SM5 and SM6).

Both the *296G* and *296S* haplotype clusters are often found in high frequencies within their  
 126 respective populations. For example, *296S* was present in 62.3% of all Burkinabè *A. coluzzii*, and  
*296G* reached 91.7% in Ghanaian *A. gambiae* (Figure 3B).

The haplotype clustering analysis shows that all non-synonymous mutations (*T345M*, *T345S*,  
*N530K*, and *H539Q*) are associated with either the *296G* or the *296S* resistance haplotypes. The  
 130 existence of seven non-synonymous mutations associated in haplotypes that have evolved over  
 the last 70 years is remarkable: mosquito *Rdl* genes are highly conserved and have accumulated  
 132 very few amino-acid mutations since anophelines diverged from culicines (for instance, *A.*  
*gambiae Rdl* retains a 97.6% amino-acidic identity with its *Aedes aegypti* ortholog and  $d_N/d_S = 0.052$ ,  
 134 indicating predominant purifying selection; Supplementary Material SM4). Here, we observe that  
 the resistant haplotypes accumulate an excess of non-synonymous mutations compared to the *wt*,  
 136 with non-synonymous to synonymous genetic diversity ratios ( $\pi_N/\pi_S$ ) being ~18x higher in the  
*296G* cluster ( $\pi_N/\pi_S = 2.428 \pm 0.009$  standard error) than in *wt* haplotypes ( $\pi_N/\pi_S = 0.135 \pm$   
 138  $0.001$ ); and ~4x higher in *296S* ( $\pi_N/\pi_S = 0.485 \pm 0.018$ ).

## The *296S* and *296G* alleles are associated with hard selective sweeps

140 Next, we investigated the signals of positive selection linked to the *296S* and *296G* resistance  
 haplotypes. First, we found that haplotypes carrying *296G* and *296S* alleles had longer regions of  
 142 high extended haplotype homozygosity (*EHH*) than the *wt* (Figure 4A), as expected under a  
 scenario of selective sweeps linked to these resistant variants. A closer examination revealed that  
 144 *EHH* decays slower at the 3' region of *Rdl* (Figure 4A): in both clusters, *EHH* is above 0.95 (i.e. 95%  
 of identical haplotypes) in the region downstream of codon 296 (exons 7 and 8), but decays more  
 146 rapidly towards the 5' of the gene (*EHH* < 0.20 in exon 6a/6b, *EHH* < 0.10 in exon 1). The core  
 resistance haplotypes had lengths of 5,344 bp for *296G* and 4,161 bp for *296S* (defined at *EHH* >  
 148 95%), which were one order of magnitude higher than *wt* haplotypes (460 bp), and covered all  
 non-synonymous mutations linked to codon 296 alleles (*T345M*, *T345S*, *N530K*, and *H539Q*).

150 Next, to estimate the softness/hardness of the sweep, we calculated the profile of Garud's *H*  
 statistics [33] and haplotypic diversity along the 2L chromosome arm (Figure 4B-D). Both *296G*  
 152 and *296S* haplotype clusters showed signals of a hard selective sweep: (i) they had markedly  
 higher Garud's  $H_{12}$  (*296G*:  $0.698 \pm 0.001$  standard error; *296S*:  $0.744 \pm 0.006$ ) than *wt* ( $0.003 \pm$   
 154  $0.0$ ), which indicates an over-abundance of the most frequent haplotypes in the cohort [33,34];  
 (ii) lower  $H_2/H_1$  ratios (*296G*:  $0.052 \pm 0.0$ ; *296S*:  $0.011 \pm 0.007$ ) than *wt* ( $0.756 \pm 0.001$ ),  
 156 indicative of a hard sweep with decreased background variation [33,34]; and (iii) low haplotypic  
 diversity (*296G*:  $0.501 \pm 0.001$ ; *296S*:  $0.377 \pm 0.007$ ) compared to the *wt* ( $0.998 \pm 0.000$ ).

# **A) Haplotype homozygosity decay**

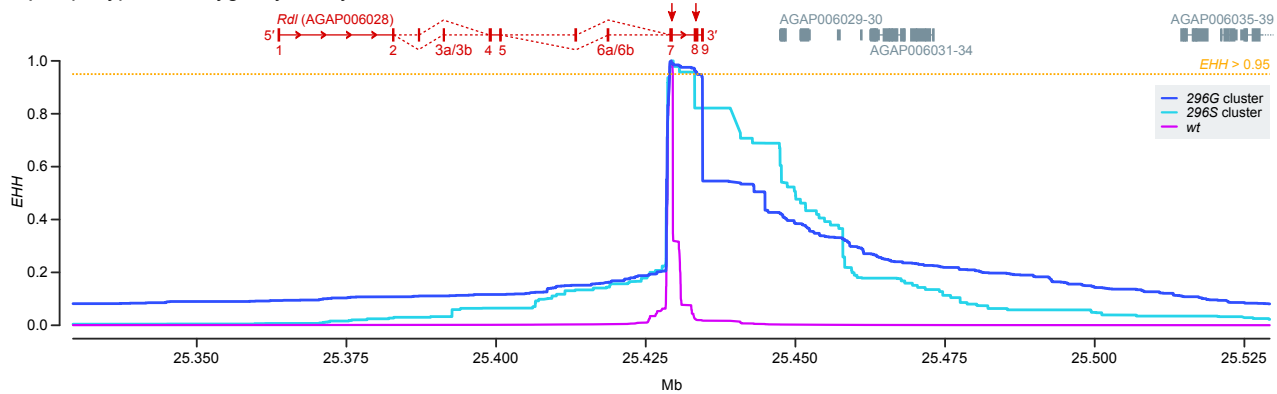

# **B) Garud $H_{12}$ (2L)**

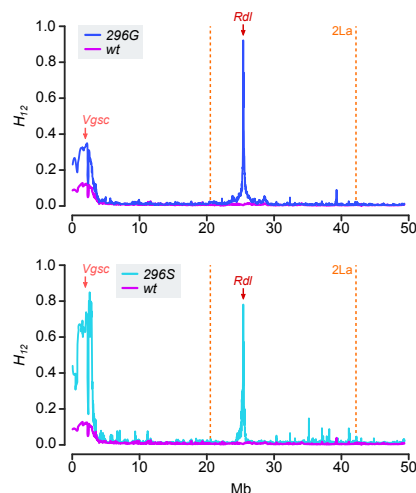

# **C) Garud $H_2/H_1$ (2L)**

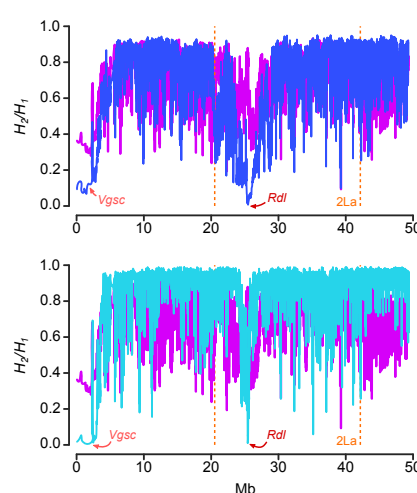

# **D) Haplotype diversity (2L)**

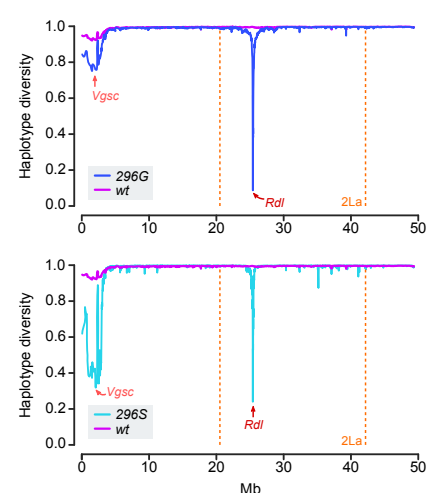

**Figure 4. Positive selection of haplotypes carrying resistance mutations. A)** Profile of  $EHH$  decay for each group of haplotypes (296G, 296S and wt), built from 11,180 phased variants located  $\pm 100,000$  bp from codon 296 (2L:25429236 position). Coordinates of nearby genes are indicated above the  $EHH$  panel (in *Rdl*, exons are numbered and red arrows indicate the position of codons 296 and 345). **B-D)** Profiles of Garud  $H_{12}$ , Garud  $H_2/H_1$  and haplotypic diversity along chromosomal arm 2L, highlighting the region covered by the 2La inversion (orange vertical lines) and the location of *Rdl* (red arrow). Each statistic was calculated separately for haplotypes carrying the 296G, 296S and wt alleles, using sliding blocks of 500 variants with 20% overlap.

Unexpectedly, chromosomes containing 296G and 296S alleles also exhibited signals of positive selection at a distant pericentromeric region of 2L (Figure 4B-D), typically associated with strong selective sweeps around two mutations in the *Vgsc* gene (995F and 995S) [25,27,35], which is the target site of pyrethroids and DDT [24]. Positive selection in *Vgsc* was particularly strong in chromosomes that also carried 296S alleles ( $H_{12} = 0.917 \pm 0.004$  standard error), followed by 296G ( $H_{12} = 0.412 \pm 0.001$ ) and, to a lesser degree, wt ( $H_{12} = 0.147 \pm 0.000$ ). However, neither of the *Vgsc* resistance alleles (995F and 995S) are in linkage disequilibrium with 296G or 296S (Supplementary Material SM7, SM8). Rather, this apparent association is due to geographical overlap: 296G and 296S are present in West African populations that are near-fixed for *Vgsc* resistance alleles (>80% 995F in 7 out of 10 populations; Supplementary Material SM8), but are mostly absent elsewhere.

Overall, *Rdl* resistance alleles are found on two unique sets of highly similar haplotypes (Figure 3),

each of them specific to one allele (296S and 296G), that underwent independent hard selective sweeps (Figure 4).

## Co-segregation of *Rdl* haplotypes and 2La inversions

*Rdl* lies within the 2La chromosomal inversion, which is the longest in the *A. gambiae* genome (20.5-42.1 Mb) [19]. The 2La inversion emerged in the last common ancestor of the *A. gambiae* species complex [32] and is currently polymorphic in *A. gambiae* and *A. coluzzii* [36], where it is linked to a range of important phenotypes including adaptation to human environments [37], aridity [38], insecticide resistance [39], and susceptibility to *Plasmodium falciparum* [40]. Given that recombination is strongly reduced between chromosomes with discordant inversion karyotypes [21–23], any assessment of the evolution of genes within the 2La inversion, such as *Rdl*, needs to take into consideration whether haplotypes reside in inverted (2La) or non-inverted (2L<sup>+</sup>) backgrounds.

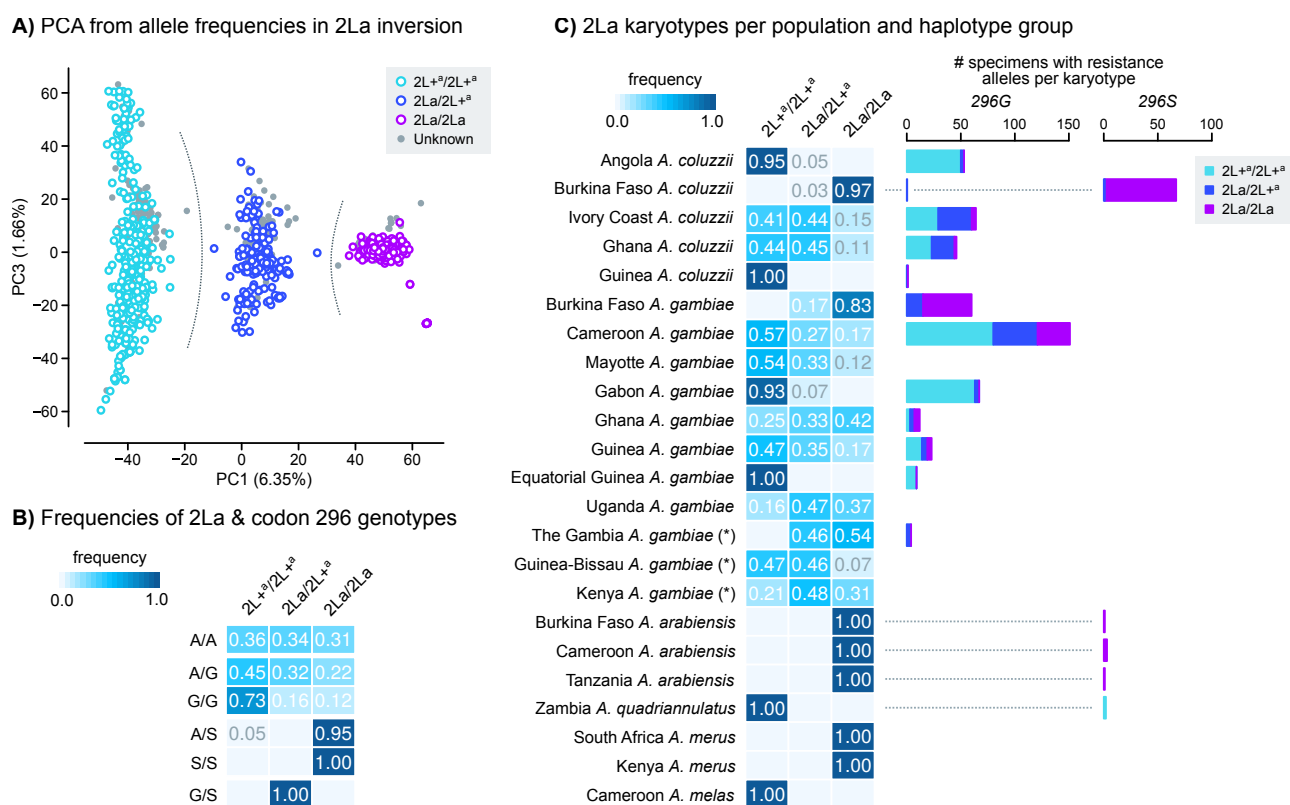

**Figure 5. Genotypes of the 2La inversion.** **A)** Principal component analysis of genotype frequencies of 10,000 random variants located within the 2La inversion (coordinates: 2L:20524058-42165532). Specimens from *Ag1000G* Phase 1 are color-coded by 2La karyotype (homozygotes and heterozygotes), and they are used as a reference to assign 2La genotypes to Phase 2 specimens (grey). Grey dotted lines highlight the separation of three clusters according to 2La karyotype. **B)** Frequency of 2La inversion and *Rdl* codon 296 genotypes. **C)** Frequency of 2La inversion karyotypes per population (heatmap, left), and number of specimens from each population carrying resistance alleles (296G and 296S), broken down by 2La karyotype (barplots, right). Note: *A. gambiae* populations denoted with an asterisk (The Gambia, Guinea-Bissau and Kenya) have high frequency of hybridisation and/or unclear species identification (see Methods).

To address this issue, we estimated the 2La inversion karyotypes for the *Ag1000G* Phase 2 samples using a principal component analysis of allele presence/absence in the inverted region



(using genomes with known inversion karyotypes as a reference; Figure 5A and Supplementary Material SM1 and SM9). The first principal component clearly discriminated between each of the inversion genotypes (non-inverted 2L<sup>+</sup><sup>a</sup>/2L<sup>+</sup><sup>a</sup> homozygotes, inverted 2La/2La homozygotes, and 2La/2L<sup>+</sup><sup>a</sup> heterozygotes). We used this information to compare the frequencies of 2La karyotypes with *Rdl* codon 296 genotypes (Figure 5B), and the karyotype frequencies per population (Figure 5C). The pan-African 296G allele is present in all inversion karyotypes, but is more common in non-inverted backgrounds (73% of 296G/296G homozygotes have 2L<sup>+</sup><sup>a</sup>/2L<sup>+</sup><sup>a</sup> karyotypes; Figure 5B), in both *A. gambiae* and *A. coluzzii* populations (Figure 5C). On the other hand, 296S alleles from *A. arabiensis* and Burkinabè *A. coluzzii* occur exclusively within the 2La inversion (100% of 296S/296S homozygotes are in 2La/2La karyotypes; Figure 5B).

## Introgression of *Rdl* resistance haplotypes

In order to obtain a more complete picture of possible introgression events, we performed a phylogenetic analysis of haplotype alignments at four loci around *Rdl*: 5' and 3' regions of the gene, and two loci upstream and downstream of the gene body (Figure 6). These phylogenies highlight two events of interspecific introgression (explored below in greater detail): 296G between *A. gambiae* and *A. coluzzii* (as reflected by their identical swept haplotypes; Figure 3), and 296S between *A. coluzzii* and *A. arabiensis*. In addition, they also confirm the spread of 296G haplotypes across different 2La inversion types (interkaryotypic introgression; Figure 5). In the following paragraphs, we characterise these introgressions and attempt to identify the donors and acceptors of each event.

## Interspecific introgression of 296G and 296S haplotypes

All four phylogenies exhibit two main clades separating *A. gambiae* and *A. coluzzii* haplotypes according to their 2La inversion karyotype, rather than by species (2La in blue, left; 2L<sup>+</sup><sup>a</sup> in red, right; ultrafast bootstrap support [UFBS] 91% and 97% respectively; Figure 6A). This clustering is due the fact that the 2La inversion has been segregating in *A. gambiae* and *A. coluzzii* since before the beginning of their speciation [32].

A closer examination shows that *Rdl*-specific phylogenies (Figure 6A, B) have a distinct sub-clade within the 2La cluster, consisting of *A. coluzzii* 296S haplotypes and *A. arabiensis*, some of which also possess the 296S allele (light blue and green sequences in Figure in Figure 6A; UFBS 97%, 84% for their sister-branch relationship). The deep branching of *A. arabiensis* haplotypes within the *A. gambiae/coluzzii* 2La clade is to be expected, as *A. arabiensis* 2La inversions descend from an ancient introgression event from the *A. gambiae/coluzzii* ancestor [32]. However, their close phylogenetic relationship with *A. coluzzii* 296S haplotypes is suggestive of interspecific introgression.

# A) *Rdl* 3' region

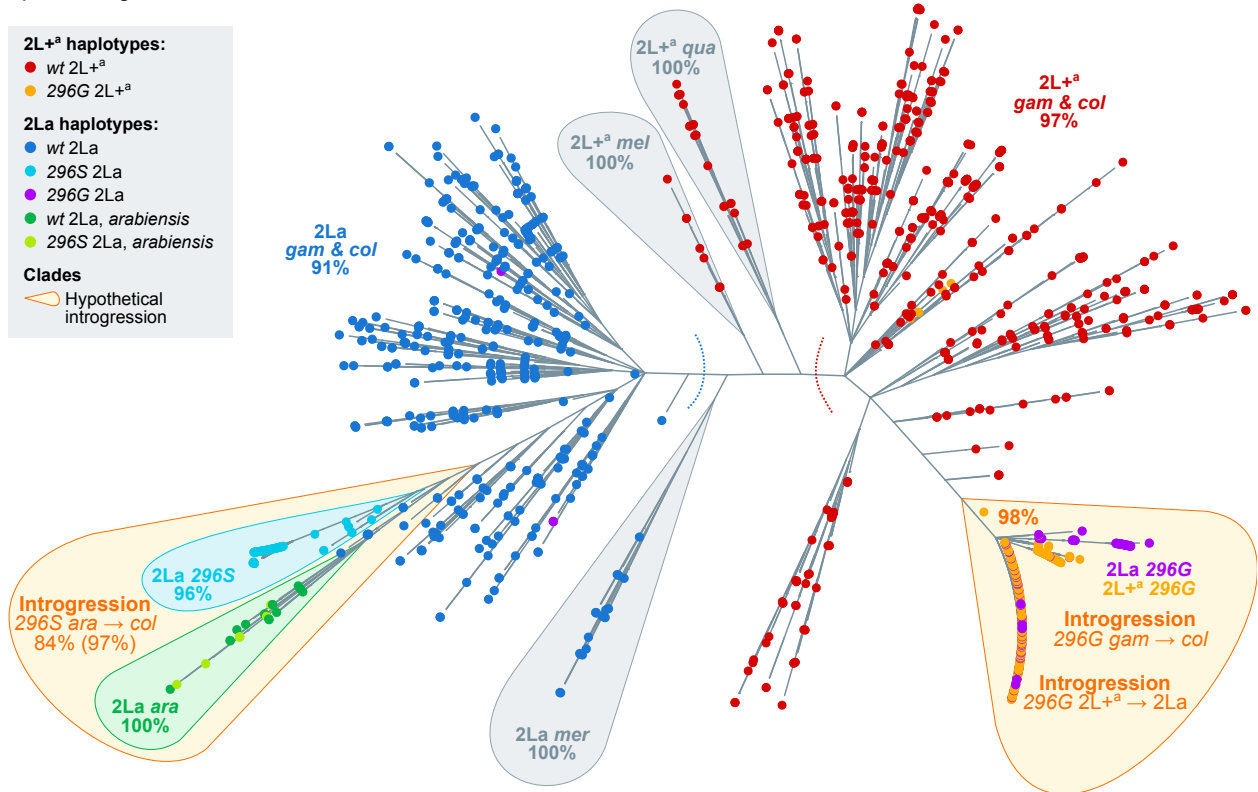

# B) *Rdl* 5' region

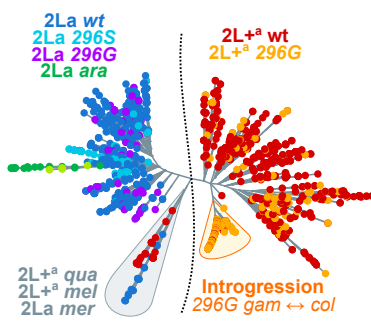

# C) 1 Mb upstream to *Rdl*

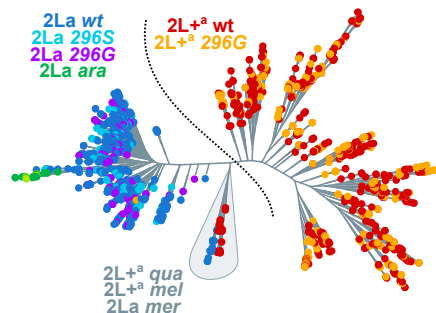

# D) 1 Mb downstream to *Rdl*

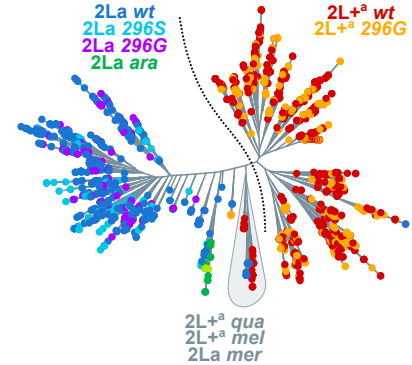

**Figure 6. Phylogenies of haplotypes around the *Rdl* locus.** A) Maximum-likelihood phylogenetic analysis of variants present at the 3' region of *Rdl* (20,000 kbp). Nodes are haplotypes and have been color-coded according to their *Rdl* genotype (296S, 296G, wt), 2La karyotype (2La, 2L<sup>+</sup>a) and species. Orange bubbles highlight clades with hypothetical introgression events. Grey bubbles highlight outgroup clades. Statistical supports are shown on selected clades (UF bootstrap). C-E) Analogous phylogenies from the *Rdl* 5' region, upstream, and downstream regions within the 2La inversion (+/- 1 Mb of *Rdl*). Complete alignments and phylogenies in Supplementary Material SM10 and SM11. Species abbreviations: *col*=*coluzzii*, *gam*=*gambiae*, *ara*=*arabensis*, *mer*=*merus*; *mel*=*melas*, *qua*=*quadriannulatus*. Arrows indicate introgression events.

To confirm this event of introgression and ascertain its direction, we compared the results of two complementary Patterson's *D* tests (Figure 7). The *D* statistic compares allele frequencies between three putatively admixing populations (A, B and C) and one outgroup (O), and can identify introgression between populations A and C (in which case *D* > 0) or B and C (*D* < 0; see Methods and [41,42]).

# **A) 296S-2La introgression *A. arabiensis* ↔ *A. coluzzii***

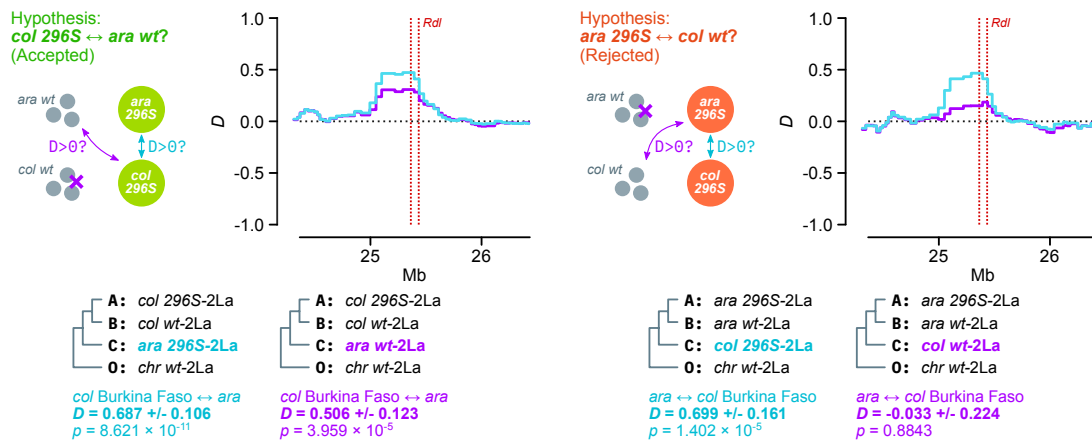

# **B) 296G-2L+<sup>a</sup> introgression *A. gambiae* ↔ *A. coluzzii***

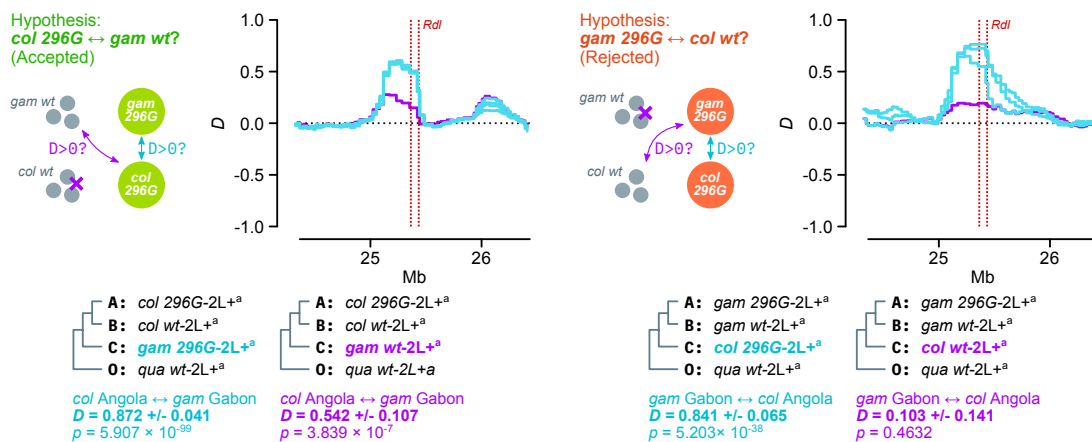

**Figure 7. Interspecific introgression. A)** Direction of 296S introgression between *A. arabiensis* and *A. coluzzii* (2La/2La background). We test two complementary hypothesis using Patterson's *D* statistics: left, introgression between *A. coluzzii* 296S homozygotes (population A), *A. coluzzii* wt (B) and *A. arabiensis* (296S or wt; C) using *A. christyi* as outgroup (O); right, reversing the position of *A. coluzzii* and *A. arabiensis* as populations A/B and C. The complementary hypotheses can be summarised as follows: if 296S homozygotes from species *i* show evidence of introgression with wt homozygotes from species *j* (first test) but not with wt from species *i* (second test), 296S originated in species *j*. **B)** Direction of 296G introgression between *A. gambiae* and *A. coluzzii* (2L+<sup>a</sup>/2L+<sup>a</sup> background), testing two complementary hypothesis using Patterson's *D* statistics: left, introgression between *A. coluzzii* 296G homozygotes (population A), *A. coluzzii* wt (B) and *A. gambiae* (296G or wt; C) using *A. quadriannulatus* as outgroup (O); right, reversing the position of *A. coluzzii* and *A. gambiae* as populations A/B and C. Color-coded cladograms at the bottom of each plot indicate the groups of specimens used in each test, including the average *D* in the *Rdl* locus with standard errors and *p*-values (estimated from the Z-score of jack-knifed estimates; see Methods). See detailed lists of comparisons and statistical analyses in Supplemental Material SM12 and SM13.

Here, if 296S had emerged in *A. arabiensis* and later introgressed into *A. coluzzii*, we would expect 296S *A. coluzzii* specimens to exhibit  $D > 0$  when compared to 296S *A. arabiensis*, but also to be more similar to wt *A. arabiensis* (from which 296S evolved) than to wt *A. coluzzii*. As predicted, we identify evidence of introgression between *A. coluzzii* 296S homozygotes and both (i) 296S *A. arabiensis* ( $D = 0.687 \pm 0.106$  standard error,  $p = 8.621 \times 10^{-11}$  derived from a Z-score distribution) and (ii) wt *A. arabiensis* ( $D = 0.506 \pm 0.123$ ,  $p = 3.959 \times 10^{-5}$ ; left panel in Figure 7A). Conversely, if 296S had introgressed from *A. coluzzii* into *A. arabiensis*, we would see evidence of introgression between 296S *A. arabiensis* and wt *A. coluzzii*, but we do not (right panel in Figure

7A;  $D = -0.033 \pm 0.224$ ,  $p = 0.884$ ). These results are robust to various choices of outgroup species (*A. christyi* and *A. epiroticus*), and tests involving a negative control with fixed 2La inversions (*A. merus*) do not show evidence of introgression with 296S specimens (Supplementary Material SM12). Thus, we conclude that the 296S allele originated in *A. arabiensis* and later spread into *A. coluzzii*.

*Rdl* phylogenies (Figure 6A, B) also show a sub-clade of highly similar *A. gambiae* and *A. coluzzii* haplotypes within the 2L<sup>+</sup><sup>a</sup> cluster, all of them carrying 296G alleles. This clade corresponds to the swept haplotypes identified above (Figure 3). We established the polarity of introgression using complementary Patterson's *D* tests. Here, we found that 296G haplotypes from resistant *A. coluzzii* populations (Côte d'Ivoire, Angola, and Ghana) exhibited signals of introgression with *wt A. gambiae* from Gabon (e.g.  $D = 0.542 \pm 0.107$ ,  $p = 3.839 \times 10^{-7}$  compared to Angolan *A. coluzzii*; Figure 7B); but that this signal of introgression disappeared when comparing *wt A. coluzzii* to 296G *A. gambiae* from Gabon (e.g.  $D = 0.103 \pm 0.141$ ,  $p = 0.4632$  compared to Angolan *A. coluzzii*; Figure 7B) or elsewhere (Supplementary Material SM13). These results support the introgression of 296G from *A. gambiae* to *A. coluzzii*.

The fact that only Gabonese *A. gambiae* have significant support as the 296G donor population could indicate that they are closer to the founding 296G haplotype and/or the original introgression event. However, the negative results in other populations harbouring 296G alleles (Cameroon, Guinea; Supplementary Material SM13) could also be due to methodological limitations of our analysis – e.g., our conservative approach is restricted to specimens that are homozygous for both the inversion karyotype (2L<sup>+</sup><sup>a</sup>/2L<sup>+</sup><sup>a</sup>) and codon 296 (296G/296G or *wt/wt*); and the similarity between *wt A. gambiae* and *A. coluzzii* relative to the highly divergent swept haplotype can hinder the identification of the original background.

## The 296G haplotype spread from 2L<sup>+</sup><sup>a</sup> to 2La chromosomes

The haplotype phylogeny from the *Rdl* 3' region, where codon 296 variants reside, also revealed that the 2L<sup>+</sup><sup>a</sup> clade (non-inverted, red; Figure 6A) contained a sub-cluster of 296G haplotypes from both 2L<sup>+</sup><sup>a</sup> (orange) and 2La orientations (purple; Figure 6A; UFBS 98%). The deep branching of 296G-2La haplotypes within the 2L<sup>+</sup><sup>a</sup> clade implies that 296G originated in a non-inverted background and later spread to inverted chromosomes via interkaryotypic introgression. Chromosomal inversions are strong barriers to recombination, but double cross-overs or gene conversion events can result in allelic exchange between non-concordant inversions [21,22] and thus explain this phylogenetic arrangement.

However, the phylogeny of *Rdl* 5' haplotypes (which excludes codon 296 and the adjacent non-synonymous mutations) showed that 296G-2La sequences (purple) branched within the *wt*-2La clade instead (blue; Figure 6B). Thus, interkaryotypic introgression only affects the swept haplotype at the 3' end of *Rdl* (Figures 3 and 4), whereas the 5' region is closer to the *wt*. We can confirm whether the introgression is specific to the 3' swept haplotype by examining the profile of

sequence divergence along the *Rdl* gene locus (*Dxy*; Figure 8). We expect 296*G* haplotypes to be more similar to *wt*-2L<sup>+</sup> than to *wt*-2La, given that the 296*G* allele first evolved in a 2L<sup>+</sup> background (blue line, *Dxy* ratio > 1; Figure 8). In the case of 296*G* alleles from 2La chromosomes, this expectation holds at the 3' region of *Rdl* but not at 5' nor outside of the gene, where allele frequencies are more similar to the *wt*-2La (purple line, *Dxy* ratio < 1; Figure 8).

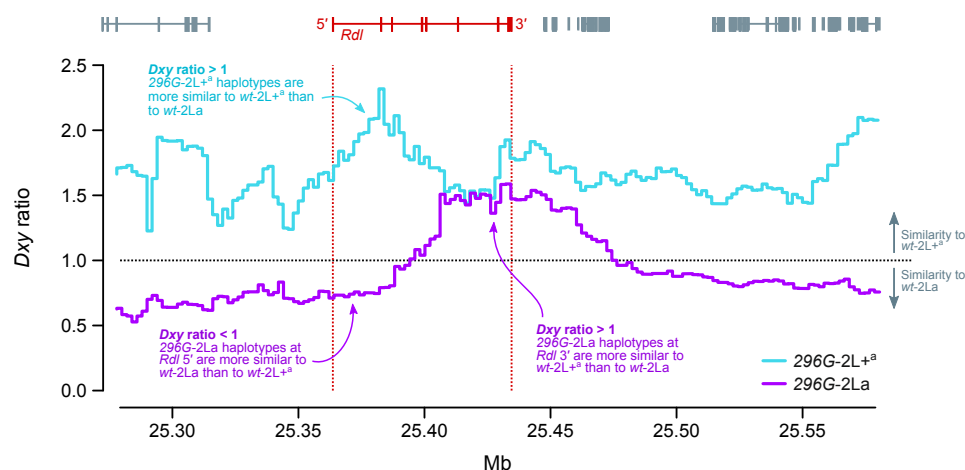

**Figure 8. Interkaryotypic introgression of 296*G* haplotypes.** Ratio of sequence divergence (*Dxy*) between 296*G* and *wt* haplotypes of 2L<sup>+</sup> and 2La origin. In this ratio, numerators are divergences between 296*G* haplotypes (of either 2L<sup>+</sup> or 2La origin, in blue and purple respectively) relative to *wt*-2La haplotypes, and denominators are relative to *wt*-2L<sup>+</sup>. Ratios >1 indicate similarity to *wt*-2L<sup>+</sup>, and values <1 indicate similarity to *wt*-2La. All values are calculated in windows of 20,000 kbp with 10% overlap.

The presence of alleles from different karyotypic backgrounds in the 296*G*-2La *Rdl* sequences is consistent with the sudden decay of haplotype homozygosity immediately upstream to codon 296 (Figure 4A), as the presence of *wt* alleles of 2La origin at 5' of the 296*G* swept haplotypes causes a faster decay in haplotype homozygosity in 2La than in 2L<sup>+</sup> haplotypes (Supplementary Material SM14A). Concordantly, haplotype diversity at the 5' region of *Rdl* is higher in 296*G*-2La than in 296*G*-2L<sup>+</sup> haplotypes (Supplementary Material SM14B).

## Structural modelling predicts that 296*G* and 296*S* disrupt the dieldrin binding site in alternative ways

Finally, we investigated the effects of 296*G* and 296*S* resistance alleles on the structure of RDL receptors. The *A. gambiae* RDL receptor was modelled as a homopentamer based on the human GABA<sub>A</sub> receptor structure [43] (Figure 9). In *wt* receptors, the 296A residue is located near the cytoplasmic end of the pore-lining second transmembrane helix (M2) and its side chain is orientated into the pore (Figure 9A), whereas codon 345 is located away from the pore, at the cytoplasmic end of the M3 helix with its side chain orientated towards the lipid bilayer. We carried out automated ligand docking for dieldrin in the *wt* receptor, finding a putative docking site along the receptor pore with estimated free energy of binding ( $\Delta G_b$ ) of -8.7 kcal/mol (Figure 9B). The 296A side chains form a major point of contact with the ligand. A structure of human GABA<sub>A</sub> in



complex with picrotoxin showed that this ligand forms multiple hydrogen bonds with residues lining the pore [43], but dieldrin lacks equivalent hydrogen bond-forming groups. Thus, the close contacts between 296A side chains and dieldrin suggest that van der Waals interactions between these molecules are the predominant binding interaction.

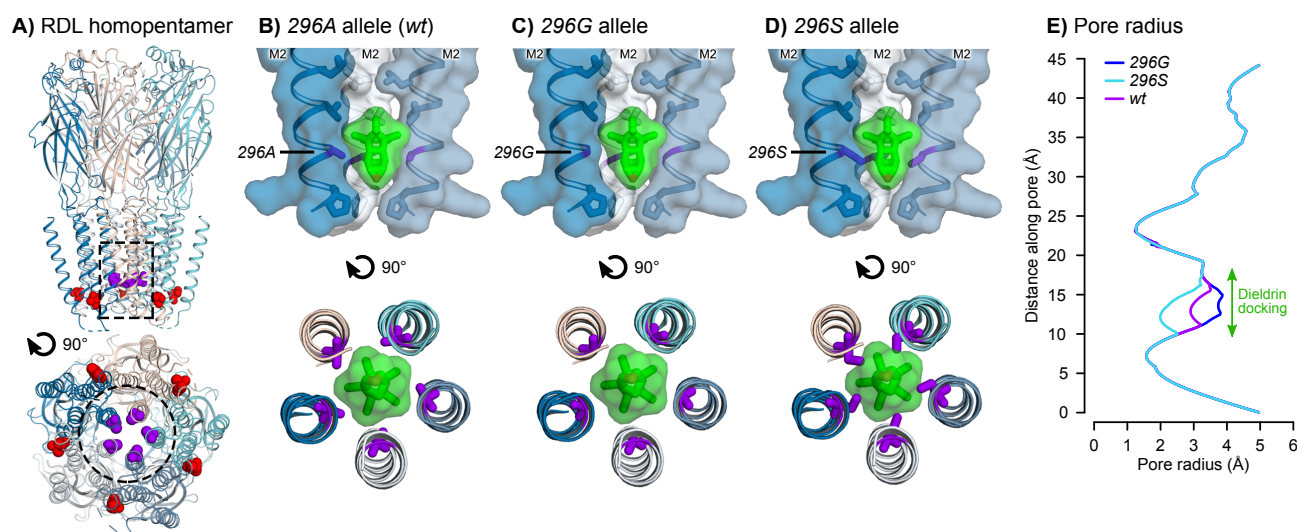

**Figure 9. RDL receptor models with docked dieldrin.** **A)** Homology model of the *A. gambiae* RDL homopentamer, viewed from the membrane plane (top) and cytoplasm (bottom). The 296A (purple) and 345T (red) positions are shown in space-fill. The dotted outlines depict the receptor regions in panels B-D. **B)** Docking prediction for dieldrin in the pore of the 296A (wt) receptor. Dieldrin is shown in green, in sticks and transparent surface. Side chains lining the pore are shown as sticks and 296A is coloured purple. **C-D)** Superimposition of dieldrin docking onto models of the 296G and 296S receptors, respectively. **E)** Pore radii in 296A, 296G and 296S models.

Next, we superimposed the *wt* dieldrin docking coordinates onto models of resistant RDL receptors, resulting in disruptions of the predicted form of interaction (Figure 9C, D). The A296G substitution widens the pore at the dieldrin docking site (2.9Å to 3.8Å) and reduces the surface area of contact between the lumen and dieldrin (Figure 9C, E). A296S has the opposite effect: it results in a narrower pore (2Å) and shows an overlap between the serine side-chains and dieldrin, which indicates that steric hindrance could prevent the insecticide from binding at this location (Figure 9D, E).

## Discussion

### Evolution of *Rdl* resistance: selective sweeps and multiple introgression events

Contemporary dieldrin-resistant *A. gambiae* and *A. coluzzii* appear to descend from two unique hard selective sweeps around the A296G and A296S mutations (Figures 3 and 4). Both sweeps occurred independently on different genomic backgrounds (Figure 6), and have undergone at least three introgression events (Figures 6-8): (i) 296G from *A. gambiae* to *A. coluzzii*; (ii) 296G from 2L<sup>+</sup><sup>a</sup> to 2La chromosomes; and (iii) 296S from *A. arabiensis* to *A. coluzzii*.

In the case of 296G, our data supports an origin in *A. gambiae* with 2L<sup>+</sup><sup>a</sup> chromosomes, followed by

interspecific introgression into *A. coluzzii*, and interkaryotypic introgression into 2La chromosomes. The *A. gambiae* origin is inferred from the background similarity between *A. coluzzii* swept haplotypes and *A. gambiae* *wt* specimens from Gabon (according to Patterson's *D* test; Figure 7B). *A. gambiae* resistance haplotypes have accrued more non-synonymous mutations than *A. coluzzii* (*N530K* and *H539Q*; Figure 1A), which is consistent with a longer evolutionary history in the former. In either case, the swept haplotype currently spans populations of both species across West and Central Africa – mimicking the pan-African selective sweep described for the homologous *Rdl* mutation in *D. melanogaster* [8,9,44]. This result is in line with previous studies that had hypothesized the existence of a pan-African *296G* sweep due to the strong genetic differentiation found in this locus [10].

The interkaryotypic introgression of *296G* haplotypes from non-inverted 2L<sup>+</sup><sup>a</sup> into 2La chromosomes (Figures 6 and 7) also facilitated the spread of *296G* resistance alleles, e.g. in *A. gambiae* populations with high frequencies of 2La/2La karyotypes such as Burkina Faso (Figure 5C). While it is generally acknowledged that chromosomal inversions strongly suppress recombination [20], genetic exchange can occur via double cross-over recombination or gene conversion [21,22,45,46]. The reduction in recombination is weaker in regions distant from the inversion breakpoints [21], as it is the case for *Rdl* (located ~4.8 Mb and ~16.7 Mb away from the 2La breakpoints), which results in reduced differentiation at the centre of the inversion [36,38] (Supplementary Material SM15). Few events of adaptive introgression across inversion karyotypes have been described in *Anopheles*. One of such cases are certain loci involved in adaptation to desiccation, which are linked to 2La inversions but are exchanged in 2La/2L<sup>+</sup><sup>a</sup> heterozygotes [38,47]. Another example, possibly linked to gene conversion, could be the *APL1* cluster of hyper-variable immune genes: its pattern of sequence variation is more strongly influenced by geography and species (*A. gambiae*/*A. coluzzii*) than by the 2La inversion [48].

On the other hand, the *296S* selective sweep has a more restricted geographical distribution. In the *Ag1000G* cohort, *296S* is only found in *A. coluzzii* from Burkina Faso (Figure 3). We also identify *296S* alleles in *A. arabiensis* specimens from East (Tanzania), Central (Cameroon) and West Africa (Burkina Faso); as well as two *A. quadriannulatus* specimens from Zambia (which appears to be the first record in this species; Figure 1B).

Interestingly, we find clear evidence of *296S* introgression from *A. arabiensis* into *A. coluzzii* even when comparing to *A. arabiensis* *wt* specimens (Figure 7A), and despite the fact that none of the *A. arabiensis* *296S* share the *A. coluzzii* swept haplotype (Figures 3A, 6A, and Supplementary Material SM6). Thus, lack of genomic evidence from *A. arabiensis* precludes the identification of the actual donor haplotype. A wider sampling of *A. arabiensis* populations will be necessary to complete the picture of *296S* evolution, in order to (i) identify the number of historical *A296S* mutations in this species; (ii) establish whether they were associated with one or more selective sweeps; and (iii) whether any of these hypothetical sweeps introgressed into *A. coluzzii*.

## Persistence of *Rdl* mutations after dieldrin withdrawal

*Rdl* is a highly conserved gene, with an extreme paucity of non-synonymous mutations over >100 Mya of evolutionary divergence [1] in culicines and anophelines, and low  $d_N/d_S$  ratios that indicate a prevalence of purifying selection (Supplementary Material SM4). In this context, the persistence of 296G and 296S alleles in natural populations for more than 70 years, in spite of its fitness costs in the absence of insecticide [14–16], has been a long-standing puzzle.

Our study provides two key insights to this question. First, we find that, relative to the *wt*, haplotypes with resistance alleles have an excess of non-synonymous genetic diversity (~18x increase in  $\pi_N/\pi_S$  in 296G, ~4x in 296S). This observation suggests that the emergence of 296G and, to a lesser degree, 296S, has substantially altered the selective regime of *Rdl* and enabled the accumulation of additional non-synonymous mutations in an otherwise highly constrained protein. A similar change has been recently observed for *kdr* mutations in *Vgsc* (the target site of pyrethroids), whereby 995F resistance haplotypes accumulate an excess of amino-acidic substitutions [25].

Second, we identify a high degree of genetic linkage between the 296G/345M and 296S/345S allele pairs, which is observed in all West African populations where codon 296 mutations are present (Figures 1, 2, and Supplementary Material SM3) due to the fact that virtually all swept haplotypes include both mutations (Figures 3 and 4). This near-universal association is highly relevant because codon 345 mutations are suspected to have compensatory effects that offset the costs of codon 296 variants [49,50]. Studies of fipronil resistance have shown that both the 296G allele and the combination of 296G and 345M alleles resulted in decreased insecticide sensitivity in *A. gambiae* [49], *D. melanogaster* [50], and *D. simulans* [51]. Crucially, Taylor-Wells *et al.* [49] showed that, in addition to fipronil resistance, the *A. gambiae* 296G allele causes heightened sensitivity to the GABA neurotransmitter (possibly contributing to the observed fitness costs [14–16]); and that the addition of the 345M mutation reduces these detrimental effects while still conferring resistance.

Interestingly, our structural modelling analyses predict opposite resistance mechanisms for each resistance allele: 296G results in a wider RDL pore with weaker van der Waals interactions with dieldrin (Figure 9C, E); whereas 296S narrows the pore and impedes dieldrin docking due to steric hindrance (Figure 9D, E). These two effects suggest the possibility that the mechanisms behind the hypothesised compensatory roles of codon 345 mutations could be different as well, and open a new line of inquiry to investigate the exclusive association of each resistance variant with downstream mutations (296G with 345M, 296S with 345S). Yet, the exact nature of the interaction between these codon 296 and 345 mutations remains unclear. Firstly, residue 345 does not have direct contacts with dieldrin or residue 296 (Figure 9A). Secondly, indirect effects are uncertain too: in human receptors, mutations on the interface between the third and second transmembrane domains (where residues 345 and 296 reside, respectively) affect the transition

390 to the desensitized functional state [52]; but residue 345 in *A. gambiae* is not buried in this  
interface and is instead facing the lipid bilayer (Figure 9A), and the predicted effects of mutations  
392 *T345M* and *T345S* are not obvious.

Other possible factors behind the persistence of *Rdl* resistance alleles include the long half-life of  
394 dieldrin as an environmental organic pollutant; as well as the fact that *Rdl* is the target site of  
other insecticides such as fipronil, isoxazoline or meta-diamides [28–30]; a secondary target of  
396 avermectin [29], and, possibly, of neonicotinoids (imidacloprid), pyrethroids (deltamethrin), [49],  
and DDT [53].

## 398 **Implications for vector control**

The apparent ease with which *Rdl* adaptive haplotypes have spread across the barriers to  
400 recombination posed by species isolation (*A. gambiae*/*A. coluzzii* and *A. arabiensis*/*A. coluzzii*) and  
non-concordant chromosomal inversions (2L<sup>+</sup>/2La) mirrors previous findings in *Vgsc* target site  
402 mutations [27], and suggests worrying consequences for insecticide deployment programmes.  
Burkina Faso, where resistance alleles have traversed both barriers to recombination, is a case-  
404 in-point example of this risk: the high frequency of 2La inversions (Figure 5C) did not prevent the  
spread of *296G*, and interspecific introgression of *296S* from *A. arabiensis* compounded this  
406 problem in *A. coluzzii*. In the future, a similar scenario could facilitate the spread of *296S* in East  
African *A. gambiae* and *A. coluzzii*, via adaptive introgression from *A. arabiensis*.

408 Also noteworthy is the overlap of *Rdl* and *Vgsc* resistance variants in West and Central Africa. The  
lack of genetic linkage between *Vgsc* and *Rdl* resistance haplotypes suggests that this co-  
410 occurrence is purely geographical, and does not fit a hypothetical epistatic relationship  
(Supplementary Material SM7 and SM8). Yet, this overlap is still relevant for vector control: as  
412 pyrethroid resistance increases in *Anopheles* populations [54], the search for substitutes should  
take into account that some can be rendered ineffective by *296S* or *296G* (e.g. fipronil [28],  
414 avermectin [29], or, possibly, neonicotinoids such as imidacloprid [49]). This risk is currently  
highest in the West and Central African populations of *A. gambiae* and *A. coluzzii* where both *296G*  
416 and *Vgsc 995F* [25] are common (Supplementary Material SM8). In the future, the introgression of  
*296S* from East African *A. arabiensis* could further compound current complications caused by the  
418 already high frequencies of *Vgsc 995S* in this region [25].

This case study of the mechanisms that underlie persistence of dieldrin resistance is also relevant  
420 for integrated resistance management. Strategies such as insecticide rotations or mosaics rely on  
a gradual decline in resistance over time [31]. Instead, *296G* and *296S* haplotypes have  
422 accumulated additional non-synonymous mutations (Figure 3A), some of which (codon 345) are  
putatively compensatory. As mentioned above, a similar altered selective regime has also been  
424 observed in *Vgsc* haplotypes with *kdr* mutations [25]. Interestingly, a study of Brazilian *Ae. aegypti*  
found that *Vgsc kdr* mutations did not decrease in frequency after a decade without public  
426 pyrethroid spraying campaigns [55]. Brazilian *Ae. aegypti* have a longer history of pyrethroid-

based treatments than African *Anopheles spp.* [55,56]; thus, their resilient *kdr* mutations could be (i) recapitulating our observations with respect to *Rdl* and dieldrin, and (ii) prefiguring a similar persistence of *Vgsc kdr* in the *A. gambiae* complex after a future phasing-out of pyrethroids in response to their decreasing efficacy [54].

Overall, our results show that the *Rdl* resistance mutations that appeared after the pioneering deployment of dieldrin in the 1950s will still be relevant in the immediate future. Continued monitoring is thus necessary to understand the evolving landscape of genomic variation that underlines new and old mechanisms of insecticide resistance.

## Methods

### Data collection

We used variation data from individual *A. coluzzii* and *A. gambiae* mosquitoes from the *Anopheles gambiae* 1000 Genomes online archives, for Phase 2-AR1 [18]. Specifically, we retrieved the phased genotype calls, SNP effect predictions, and the array of accessible genomic positions. We also obtained the same data for populations of four species in the *Anopheles* complex (*A. arabiensis*, *A. quadriannulatus*, *A. melas* and *A. merus*) and two outgroups (*A. epiroticus* and *A. christyi*), as available in the *Ag1000G* online archive [18]. The complete list of downloaded genomes with accession codes is available in Supplementary Material SM1.

The reference gene annotation of *A. gambiae* was obtained from Vectorbase [57] (GFF format, version AgamP4.9). Gene and variant coordinates employed in this study are based on the AgamP4 version of the genome assembly.

### Genotype frequencies and linkage disequilibrium

We retrieved all non-synonymous genomic variants located within the coding region of *Rdl* (genomic coordinates: 2L:25363652-25434556) that were biallelic, phased, and segregating at >5% frequency in at least one population (henceforth, ‘non-synonymous variants’). Parsing and filtering of genotype calls from *Ag1000G* was done using the *scikit-allel* 1.2.1 library [58] in Python 3.7.4.

We calculated the linkage disequilibrium between each pair of non-synonymous variants using (i) Rogers’ and Huff *r* correlation statistic [59], as implemented in *scikit-allel* (*rogers\_huff\_r*); and (ii) Lewontin’s *D'* statistic [60], as implemented in [25].

### Haplotype networks

We constructed a network of haplotype similarity using 626 biallelic, phased and non-singleton (shared between more than two samples) variants located in a region  $\pm$  10kbp of *Rdl* codon 296 (middle nucleotide, coordinate 2L:25429236). We used the presence/absence of each allele within



460 this genomic region to calculate Hamming distances and build minimum spanning networks [61],  
 using the *hapclust* function from [25] (with distance breaks >3 variants). Network visualizations  
 462 were produced using the *graphviz* 2.38.0 Python library [62], with haplotype clusters being color-  
 coded according to species, population and presence/absence of the resistance alleles in codon  
 464 296 (296S, 2L:25429235; 296G, 2L:25429236) and the 995th codon of *Vgsc* (Figure 3,  
 Supplementary Material SM5, and SM6). The network visualization in Figure 3A excludes  
 466 singletons and haplotype clusters with a cohort frequency <1%.

We calculated the sequence diversity ( $\pi$ ) of each haplotype group in the same region  
 468 (*sequence\_diversity* function in *scikit-allel*), using a jack-knife procedure (iterative removal of  
 individual haplotypes without replacement) [63] to estimate the average and standard error. We  
 470 also calculated the sequence diversity in non-synonymous coding variants from this region ( $\pi_N$ ),  
 synonymous coding variants ( $\pi_S$ ), and their ratio ( $\pi_N/\pi_S$ ).

## 472 Positive selection in haplotype clusters

We analysed the signals of positive selection in three haplotype groups, divided according to  
 474 alleles in codon 296: *wt* ( $n = 1476$ ), 296S ( $n = 94$ ) and 296G ( $n = 651$ ) (Supplementary Material  
 SM5). First, we calculated the extended haplotype homozygosity decay (*EHH*) of each group of  
 476 haplotypes, using 22,910 variants (phased and biallelic) located  $\pm 200$  kbp of codon 296  
 (2L:25429236) (using the *ehh\_decay* utility in *scikit-allel*). For each haplotype group, we recorded  
 478 the genomic region where *EHH* decay >0.95 and <0.05.

Second, we calculated the profile of Garud's *H* statistics [33] along the 2L chromosomal arm  
 480 (*moving\_garud\_h* utility in *scikit-allel*; block length = 500 phased variants with 20% step). We  
 performed the same calculations for the haplotypic diversity (*moving\_haplotype\_diversity* in *scikit-*  
 482 *allel*). We calculated the Garud *H* and haplotypic diversity estimates in the *Rdl* locus, using a jack-  
 knife procedure [63] (iterative removal of individual haplotypes without replacement) to calculate  
 484 the mean and standard error of each statistic.

## Karyotyping of 2La inversions

486 In order to assign karyotypes of the 2La inversion in all specimens from *Ag1000G* Phase 2, we  
 used known 2La karyotypes from Phase 1 as a reference [2], and analysed genotype frequencies  
 488 within the inversion by principal component analysis (PCA). Specifically, we retrieved the  
 genotype frequencies of 1142 specimens from *Ag1000G* Phase 2, 765 of which were also present  
 490 in Phase 1 and had been previously karyotyped for this inversion [2]; and selected 10,000 random  
 SNPs (biallelic, shared between more than two samples, phased, segregating in at least one  
 492 population, and located within the 2La inversion 2L:20524058-42165532). SNPs fitting these  
 criteria were selected using the *scikit-allel* Python library, and the PCA was performed using the  
 494 *randomized\_pca* utility (with Patterson scaling).

Manual inspection of the principal components (Supplementary Material SM9) showed that PC1 (6.35% of variance explained) was sufficient to discriminate between known karyotypes from Phase 1 using a clear-cut threshold (2La/2La, 2La/2L<sup>a</sup> and 2L<sup>a</sup>/2L<sup>a</sup>). We determined the optimal classification thresholds using the C-Support Vector classification method (SVC, a method for supervised learning) implemented in the *scikit-learn* 0.21.3 Python library [64]. Specifically, we used the *SVC* function in *scikit-learn* (*svm* submodule) to train a classifier with known karyotypes from Phase 1 (765 observations) and the main principal components of the PCA analysis (10 variables), using a linear kernel and C=1. The selected thresholds were able to classify Phase 1 data into each of the three categories (2La/2La, 2La/2L<sup>a</sup> and 2L<sup>a</sup>/2L<sup>a</sup>) with 100% accuracy (as per the classifier *score* value), precision and recall (calculated using the *classification\_report* function from the *scikit-learn metrics* submodule).

## Phylogenetic analysis of haplotypes

We obtained genomic alignments of SNPs located from four regions around the *Rdl* locus, at the following coordinates: (i) 5' start of the gene (2L:25363652 +/- 10,000 kbp, 696 variants), (ii) 3' end of the gene (2L:25434556 +/- 10,000 kbp, 428 variants), (iii) unadmixed region 1Mb upstream of *Rdl* (2L:24363652 + 20,000 kbp; 2903 variants; inside of the 2La inversion), and (iv) unadmixed region 1Mb downstream of *Rdl* (2L:26434556 + 20,000 kbp, 2594 variants; inside of the 2La inversion). These alignments were built from of phased, biallelic variants within the aforementioned regions, obtained from *A. coluzzii* and *A. gambiae* (Ag1000G Phase 2), *A. arabiensis*, *A. quadriannulatus*, *A. melas* and *A. merus*. We restricted our analysis to haplotypes pertaining to individuals homozygous for the 2La inversion (2La/2La and 2L<sup>a</sup>/2L<sup>a</sup>), totalling 1684 haplotypes (out of 2356 haplotypes in the original dataset, obtained from 1178 specimens). Invariant sites were removed from the alignments using *snp-sites* 2.3.3 [65]. All alignments are available in Supplementary Material SM10.

Each genomic alignment was then used to compute Maximum-Likelihood phylogenetic trees using *IQ-TREE* 1.6.10 [66]. The best-fitting nucleotide substitution model for each alignment was selected using the *TEST* option of *IQ-TREE* and according to the Bayesian Information Criterion (BIC), which suggested the GTR substitution matrix with ascertainment bias correction, four gamma ( $\Gamma$ ) rate categories, and empirical state frequencies observed from the alignment (F) (i.e. the *GTR+F+ASC+G4* model in *IQ-TREE*). We calculated branch statistical supports using the UF bootstrap procedure [67,68] and refined the tree for up to 10,000 iterations, until convergence was achieved (correlation coefficient  $\geq 0.99$ ).

Tree visualizations were created in R, using the *plot.phylo* function from the *ape* 5.3 library [69] and *stringr* 1.4.0 [70]. Each phylogeny was midpoint-rooted with *phytools* 0.6-60 [71] (*midpoint.root*), and branch lengths in Figure 6 were constrained for display purposes ( $5 \times 10^{-5}$  to  $5 \times 10^{-3}$  per-base substitutions range; unmodified trees available in Supplementary Material SM11).

## 532 Interspecific introgression with Patterson's $D$ statistic

We analysed the signals of introgression along the 2L chromosomal arm using Patterson's  $D$  statistic [41,42]. This statistic requires allele frequencies in four populations (A, B, C and O) following a predefined (((A,B),C),O) phylogeny, where A, B and C are populations with possible introgression events, and O is an unadmixed outgroup. Then,  $D > 0$  if there is an excess of allele frequency similarities between A and C (which means either  $A \rightarrow C$  or  $C \rightarrow A$  introgression) and  $D < 0$  for excess of similarity between B and C ( $B \rightarrow C$  or  $C \rightarrow B$  introgression) [41,42]. We calculated Patterson's  $D$  along blocks of adjacent variants in the 2L chromosomal arm (block length = 10,000 variants, with 20% step length; phased variants only) using the *moving\_patterson\_d* utility in *scikit-allel*. We also calculated  $D$  in the *Rdl* locus (2L:25363652-25434556), and estimated its deviation from the null expectation (no introgression:  $D = 0$ ) with a block-jackknife procedure (block length = 100 variants; *average\_patterson\_d* in *scikit-allel*). We then used these jack-knifed estimates to calculate the standard error, Z-score and the corresponding  $p$  value from the two-sided Z-score distribution.

Using the procedure described above, we performed multiple analyses of introgression between combinations of populations fitting the (((A,B),C),O) phylogeny. For each analysis, we selected A, B, C and O populations according to two criteria: (i) which interspecific introgression event was under test (*A. gambiae* ~ *A. coluzzii* or *A. coluzzii* ~ *A. arabiensis*); (ii) homozygous karyotypes of the 2La inversion within which *Rdl* is located (given that it introduces a strong effect on genotype frequencies across the entire *A. gambiae* species complex [32]) and the resistance haplotype in question; and (iii) exclude populations with high frequencies of hybrids, with controversial species identification, or with extreme demographic histories (Guinea-Bissau, The Gambia, and Kenya) [2,72]. Following these criteria, we then tested the presence and direction introgression between the combinations of populations specified below.

First, we tested the *A. coluzzii* ~ *A. arabiensis* introgression of the 296S haplotype in inverted genomes (2La/2La homozygotes; Figure 7A and Supplementary Material SM12). We performed two versions of this test, using either *A. coluzzii* or *A. arabiensis* as donors (population C), which can give an indication of the population of origin of the 296S mutation. First, we tested the *A. arabiensis* → *A. coluzzii* hypothesis using: (i) 296S homozygous *A. coluzzii* from Burkina Faso as population A; (ii) *wt* homozygous *A. coluzzii* from Burkina Faso as population B; (iii) *A. arabiensis* and *A. merus* specimens as multiple C populations (donors) C, treating 296S and *wt* homozygous specimens as different populations; and (iv) *A. epiroticus* and *A. christyi* as population O. Second, we tested the *A. coluzzii* → *A. arabiensis* hypothesis but switching the position of *A. arabiensis* (now population A and B, for 296S and *wt* respectively) and *A. coluzzii* populations (now population C, together with the *A. merus* negative control). Under this setup, we expect to see evidence of introgression between 296S *A. coluzzii* and 296S *A. arabiensis* in both tests (positive controls), but a positive result with any of the *wt* comparisons can indicate that 296S haplotypes in either species is more similar to *wt* from the other (and hence, the second species is the species of origin). A detailed account of all

comparisons, populations and complete statistical reports are available in Supplementary Material SM12.

We performed the same series of tests for the *A. gambiae* ~ *A. coluzzii* introgression of the 296G cluster in individuals without the 2La inversion (2L<sup>+</sup>/2L<sup>+</sup> homozygotes; Figure 7B and Supplementary Material SM13A, B) and with the 2La inversion (Supplementary Material SM13C, D). In these tests, homozygous individuals from various *A. gambiae* and *A. coluzzii* populations were alternatively used as groups A/B (A if 296G, B if *wt*) and C (296G and *wt*, separately); and *wt* outgroups were selected according to their 2La karyotype (2L<sup>+</sup>/2L<sup>+</sup>: *A. quadriannulatus* and *A. melas*; 2La/2La: *A. merus*). A detailed account of all comparisons, populations and complete statistical reports are available in Supplementary Material SM13.

## Sequence divergence between 2La karyotypes

To ascertain whether 296G karyotypes from 2La chromosomes were introgressed from a 2L<sup>+</sup> background, we calculated the absolute sequence divergence (*Dxy* [73]) around the *Rdl* locus between all combinations of the following groups of haplotypes: (i) between 296G-carrying haplotypes from 2L<sup>+</sup>/2L<sup>+</sup> homozygotic genomes, (ii) *wt* haplotypes from 2La/2La; (iii) 296G haplotypes from 2La/2La, (iv) *wt* haplotypes from 2La/2La (Figure 8). *Dxy* estimates were calculated along the 2L arm using the *windowed\_divergence* utility in *scikit-allel* (window size=20,000 bp with 10% overlap). At each window, we also calculated the ratio between the following *Dxy* estimates: (i) 296G-2L<sup>+</sup> ~ *wt*-2La / 296G-2L<sup>+</sup> ~ *wt*-2L<sup>+</sup>; and (ii) 296G-2La ~ *wt*-2La / 296G-2La ~ *wt*-2L<sup>+</sup>. Thus, windows with ratios >1 are more similar to the *wt*-2L<sup>+</sup> background, and windows with ratios <1 are more similar to the *wt*-2La background.

## Alignment of *Rdl* orthologs

We retrieved *Rdl* orthologs from the following species of the Culicidae family (available in Vectorbase): *A. gambiae*, *A. arabiensis*, *A. melas*, *A. merus*, *A. christyi*, *A. epiroticus*, *A. minimus*, *A. culicifacies*, *A. funestus*, *A. stephensi*, *A. maculatus*, *A. farauti*, *A. dirus*, *A. atroparvus*, *A. sinensis*, *A. albimanus*, *A. darlingi*, *Ae. aegypti*, *Aedes albopictus*, and *Culex quinquefasciatus*. We retained (i) those orthologs that resulted in complete predicted peptides (defined as having the same start and end codons as the *A. gambiae Rdl*), and (ii) the longest isoform per gene (except for *A. gambiae*, where all three isoforms were retained). These sequences were aligned using MAFFT 7.310 (1,000 rounds of iterative refinement, G-INS-i algorithm) [74]. Pairwise sequence identity between peptide sequences was calculated using the *dist.alignment* function (with a identity distance matrix, which was then converted to a pairwise identities) from the *seqinr* 3.4-5 library [75], in R 3.6.1 [76]. Pairwise *d<sub>N</sub>/d<sub>S</sub>* ratios were calculated from a codon-aware alignment of CDS sequences, using the *dnds* function from the *ape* 5.3 R library [77]. The codon-aware alignment of full-length CDS was obtained with PAL2NAL [78], using the peptide alignment as a reference. Tables of pairwise identity and *d<sub>N</sub>/d<sub>S</sub>* values have been created with *pheatmap* 1.0.12 [79].

## 606 Homology modelling and automated ligand docking

The structure of human GABA<sup>A</sup> receptor bound with picrotoxin (PDB accession: 6HUG) provided  
 608 the template for generating a homology model of the homopentameric *A. gambiae* RDL receptor  
 (UniProtKB accession: Q7PII2). Sequences were aligned using *Clustal Omega* [80], and 50  
 610 homology models were generated using *MODELLER* 9.23 [81]. A single best model was chosen  
 based on the internal scoring values from *MODELLER* and by visually inspecting models in *Swiss-*  
 612 *PdbViewer* [82] to eliminate candidates with structural problems. The *A296G* and *A296S* mutants  
 were generated using *Swiss-PdbViewer* to introduce the amino acid substitutions and to energy  
 614 minimise the resulting structures using 50 steps of conjugate gradient energy minimization. The  
 pore radii of the channel models were calculated using *HOLE* 2.0 [83]. The 3-dimensional  
 616 structure of dieldrin was generated ab initio using *MarvinSketch* 19.22 of the ChemAxon suite [84].  
*AutoDockTools* 1.5.6 [85] was used to define rotatable bonds and merge non-polar hydrogens.  
 618 Automated ligand docking studies with the wild-type GABA receptor model were performed using  
*AutoDock Vina* 1.1.2 [86] with a grid of 20 × 20 × 20 points (1Å spacing) centred on the channel  
 620 pore. Figures were produced using *PyMOL* [87].

## Availability of code and data

622 Python (3.7.4) and R scripts (3.6.1) to reproduce all analyses in this manuscript are available on  
 GitHub: <https://github.com/xgrau/rdl-Agam-evolution>  
 624 All genome variation data has been obtained from the publicly available repositories of the  
*Ag1000G* project Phase 2-AR1 [18]. Accession codes are available in Supplementary Material SM1  
 626 and download instructions can be found in the above-mentioned GitHub repository.

## Author contributions

628 XGB, MD and DW designed the study. XGB carried out the analyses of sequence diversity, selection  
 and introgression, with assistance and code contribution from ST, NJH and AM. AOR carried out  
 630 the structural modelling analyses. The *Ag1000G* Consortium undertook collection, preparation,  
 sequencing, and primary analysis of the samples. All authors read and approved the final  
 632 manuscript.

## Funding

634 This work was supported by the National Institute of Allergy and Infectious Diseases (R01-  
 AI116811; the Wellcome Trust (090770/Z/09/Z; 090532/Z/09/Z; 098051); the Medical Research  
 636 Council UK and the Department for International Development (MR/M006212/1) and the Medical  
 Research Council (MR/P02520X/1). The latter grant is a UK funded award and is part of the  
 638 EDCTP2 programme supported by the European Union. The content of this manuscript is solely  
 the responsibility of the authors and does not necessarily represent the official views of the



640 National Institute of Allergy and Infectious Diseases, or the National Institutes of Health.

## Acknowledgements

642 We thank Arjèn Van 't Hof and Eric Lucas (LSTM) for fruitful discussions on the manuscript and  
its methods. We also thank Chris Clarkson (Wellcome Sanger Institute) for making his code  
644 publicly available.

## Supplementary legends

**Supplementary Material SM1. Data sources.** List of genome samples from *Ag1000G* Phase 2-AR1 (table A), the Phase 1-AR3 subset (table B) (both of which contain *A. gambiae* and *A. coluzzii* specimens), and outgroup species (table C; includes *A. arabiensis*, *A. quadriannulatus*, *A. christyi*, *A. epiroticus*, *A. merus* and *A. melas*). For each sample, we include their country and population of origin, accession numbers (based on *Ag1000G* for Phase 1 and 2, and on NCBI SRA for outgroups), and the estimated 2La karyotypes.

**Supplementary Material SM2. List of genetic variants in *Rdl*.** **A)** List of all variants present in the *Rdl* gene (AGAP006028), including their genomic coordinates, reference and alternative alleles, coordinates of the mutation along *Rdl* CDS and peptide sequences, effect on the peptide sequence (aminoacid substitution), and frequencies in each of the populations of the cohort (Phase 2 and outgroups). **B)** Genotypes of *Rdl* non-synonymous mutations in each sample (for the six mutations reported in Figure 1), where 0=wt homozygote, 1=heterozygote, 2=alternate allele homozygote.

**Supplementary Material SM3. Linkage disequilibrium in *Rdl*.** Linkage disequilibrium between non-synonymous mutations in *Rdl*, separated by population. Only populations where non-synonymous variants are shown are displayed. For each population, we display Huff and Rogers'  $r$  (left) and Lewontin's  $D'$  (right).

**Supplementary Material SM4. Alignments of *Rdl* orthologs.** **A)** Alignment of *Rdl* orthologs from 12 species from the Culicidae family: *A. gambiae* (Anogam), *A. arabiensis* (Anoara), *A. atroparvus* (Anoatr), *A. darlingi* (Anodar), *A. dirus* (Anodir), *A. epiroticus* (Anoepe), *A. farauti* (Anofar), *A. funestus* (Anofun), *A. merus* (Anomer), *A. minimus* (Anomin), and *Ae. aegypti* (Aedaeg). Pfam-predicted protein domains, transmembrane regions and the 296 and 345 codons are shown on top of the alignment (coordinates based on the *A. gambiae* ortholog). **B-C)** Pairwise sequence identity and  $d_N/d_S$  between *Rdl* orthologs, including all *A. gambiae* isoforms (RA, RB, RC).

**Supplementary Material SM5. Haplotype classification and population frequency.** **A)** Clustering of haplotypes according to the minimum spanning networks (built from 626 phased variants located around codon 296; Figure 3 and Supplementary Material SM6). For each cluster, we report their population and country of origin, species, and allele present in *Rdl* codon 296 (*296G*, *296S*, *wt*) and *Vgsc* codon 995 (*995F*, *995S* and *wt*). Cluster "4" includes haplotypes with *296G* alleles, cluster "34" includes *296S* alleles; all other clusters are *wt*. **B)** Absolute frequency of *296G*, *296S* and *wt* haplotype clusters per population.

**Supplementary Material SM6. Minimum spanning networks of *Rdl* haplotypes.** Minimum spanning networks of haplotypes around *Rdl* codon 296 (626 phased variants located +/- 10,000 bp from the 2L:25429236 position), including all non-singleton haplotype clusters. Purple arrows indicate the direction of non-synonymous mutations (relative to reference assembly). **A)** Nodes are color-coded according to genotype in *Rdl* codon 296. **B)** Nodes are color-coded according to genotype in *Vgsc* codon 995. **C)** Nodes are color-coded according to species.

**Supplementary Material SM7. Linkage disequilibrium of *Rdl* and *Vgsc*.** Linkage disequilibrium between non-synonymous mutations in *Rdl* and *Vgsc*, calculated using Huff and Rogers'  $r$  (A) and Lewontin's  $D'$  (B). Resistance variants in both genes are highlighted in orange (*Vgsc*) and cerise red (*Rdl*).

**Supplementary Material SM8. Co-segregation of *Rdl* and *Vgsc* mutations.** **A-B)** Frequency of alleles in *Vgsc* codon 995 and *Rdl* codon 296 per population, calculated per chromosome. Note: *A. gambiae* populations denoted with an asterisk (The Gambia, Guinea-Bissau and Kenya) are listed separately due to their high frequency of hybridisation and/or unclear species identification (see Methods). **C)** Geographical co-occurrence of *Rdl* and *Vgsc* mutations, at 10% and 30% frequency thresholds (chosen for illustrative purposes). Dots indicate presence. **D)** Euler diagrams and contingency table depicting the co-occurrence of *Vgsc* *995F* and *995S* alleles with *Rdl* *296G*, *296S* and *wt* alleles within chromosomes analysed in this study ( $n = 2356$ ). For chromosomes carrying each of the *Rdl* haplotype groups, we include the percentage of associated genotypes at *Vgsc* codon 995. **E)** Number of chromosomes carrying *296S* or *296G* mutations (x axis) against number of *995F* mutations (y axis), per population (only values >0 included). **F)** Contingency tables of *Rdl* and *Vgsc* resistance mutations co-occurrence, per

population. Only populations where resistance alleles in are segregating in both genes are included. *p* values and odds ratios [OR] correspond to Fisher's exact tests (one-sided, testing for a greater co-occurrence of *Rdl* codon 296 and *Vgsc* 995 resistance alleles).

**Supplementary Material SM9. PCA of 2La karyotypes.** Principal component (PC) analysis of allele presence/absence from 10,000 random variants located within the 2La inversion (coordinates: 2L:20524058-42165532). Specimens from *Ag1000G* Phase 1 and *A. arabiensis* are color-coded by 2La genotype (homozygotes and heterozygotes, blue-purple), and they are used as a reference to assign 2La genotypes to Phase 2 specimens (grey). Panels A and B show PC1, PC2 and PC3; panel C shows the fraction of variance explained by each PC. The 2La karyotypes of all Phase 2 specimens are available in Supplementary Material SM1.

**Supplementary Material SM10. Alignments of *Rdl* haplotypes.** **A)** 5' start of the gene (2L:25363652, 696 variants). **B)** 3' end of the gene (2L:25434556, 428 variants). **C)** Unadmixed upstream region within the 2La inversion (1 Mb upstream of *Rdl*; 2903 variants). **D)** Unadmixed downstream region within the 2La inversion (1 Mb downstream of *Rdl*, 2594 variants). The name of each sequence name indicates the specimen (codes from Supplementary Material SM1; e.g. AA0040-C), haplotype (a or b), population of origin (e.g. GHcol), genotype at codon 296 (gt0=wt, gt1=296G, gt2=296S), and 2La background (kt0=2L<sup>+</sup>/2L<sup>+</sup>, kt1=2La/2L<sup>+</sup>, kt2=2La/2La).

**Supplementary Material SM11. Phylogenies of *Rdl* haplotypes.** Phylogenetic trees from alignments around the *Rdl* locus (Supplementary Material SM10), in Newick format and including ultrafast bootstrap (UFBS) statistical supports. The name of each sequence (e.g. "AA0040-Ca\_GHcol\_gt0\_kt0") indicates the specimen (codes from Supplementary Material SM1; "AA0040-C"), chromosome ("a" or "b"), population of origin ("GHcol"), allele at codon 296 (gt0=wt, gt1=296G, gt2=296S), and 2La karyotype (kt0=2L<sup>+</sup>/2L<sup>+</sup>, kt1=2La/2L<sup>+</sup>, kt2=2La/2La).

**Supplementary Material SM12. 296S introgression between *A. coluzzii* and *A. arabiensis*.** **A)** Profile of Patterson's *D* in 2La/2La backgrounds, using *A. coluzzii* specimens as populations A and B (296S and *wt*, respectively); *A. arabiensis* as population C (296S as positive controls, *wt* as test), *A. merus* as a negative control for population C (*wt*); and either *A. christyi* or *A. epiroticus* as outgroups (*wt*). **B)** Profile of Patterson's *D* in 2La/2La backgrounds, using *A. arabiensis* specimens as populations A and B (296G and *wt*, respectively); *A. coluzzii* as population C (296S as positive controls, *wt* as test), *A. merus* as a negative control for population C (*wt*); and either *A. christyi* or *A. epiroticus* as outgroups (*wt*).

In all panels, the hypothesis under test can be summarised as follows: if 296S homozygotes from species *i* show evidence of introgression with *wt* homozygotes from species *j* but not with *wt* from *i*, it means that 296S originated in species *j*. Left plots depict the entire 2L chromosomal arm (orange lines demarcate 2La inversion), and rightmost plots focus on the *Rdl* locus (*Rdl* gene coordinates highlighted in red). *D* was calculated in sliding blocks of 10,000 phased variants (with 20% overlap). For each comparison, we report the mean value of *D* in the *Rdl* locus and use a block-jackknife procedure (block length = 100 variants) to estimate its standard error, a Z-score (standardized *D*) and *p*-value (that reflects deviation from the null expectation of *D* = 0).

**Supplementary Material SM13. 296G introgression between *A. gambiae* and *A. coluzzii*.** **A)** Profile of Patterson's *D* in 2L<sup>+</sup>/2L<sup>+</sup> backgrounds, using *A. coluzzii* specimens as populations A and B (296G and *wt*, respectively); *A. gambiae* as population C (296G as positive controls, *wt* as test); and either *A. quadriannulatus* or *A. melas* as outgroups (*wt*). **B)** Profile of Patterson's *D* in 2L<sup>+</sup> backgrounds, using *A. gambiae* specimens as populations A and B (296G and *wt*, respectively); *A. coluzzii* as population C (296G as positive control, *wt* as test); and either *A. quadriannulatus* or *A. melas* as outgroups (*wt*). **C)** Profile of Patterson's *D* in 2La/2La backgrounds, using *A. coluzzii* specimens as populations A and B (296G and *wt*, respectively); *A. gambiae* as population C (296G as positive controls, *wt* as test); and *A. merus* as outgroup (*wt*). **D)** Profile of Patterson's *D* in 2La/2La backgrounds, using *A. gambiae* specimens as populations A and B (296G and *wt*, respectively); *A. coluzzii* as population C (296G as positive controls, *wt* as test); and *A. merus* as outgroup (*wt*).

In all panels, the hypothesis under test can be summarised as follows: if 296G homozygotes from species *i* show evidence of introgression with *wt* homozygotes from species *j* but not with *wt* from *i*, it means that 296G originated in species *j*. Left plots depict the entire 2L chromosomal arm (orange lines demarcate 2La inversion), and rightmost plots focus on the *Rdl* locus (*Rdl* gene coordinates highlighted in red). *D* was calculated in sliding blocks

of 10,000 phased variants (with 20% overlap). For each comparison, we report the mean value of  $D$  in the *Rdl* locus and use a block-jackknife procedure (block length = 100 variants) to estimate its standard error, a Z-score (standardized  $D$ ) and  $p$ -value (that reflects deviation from the null expectation of  $D = 0$ ).

**Supplementary Material SM14. Diversity of 296G haplotypes in 2L<sup>+</sup> and 2La backgrounds.** **A)** Profile of *EHH* decay for each group of 296G haplotypes (296G in 2L<sup>+</sup>/2L<sup>+</sup>, 2La/2L<sup>+</sup> and 2La/2La backgrounds), built from 16,623 phased variants located  $\pm 150,000$  bp from codon 296 (2L:25429236 position). **B)** Profile of haplotypic diversity along chromosomal arm 2L (sliding blocks of 500 variants with 20% overlap). **C)** Absolute sequence divergence ( $D_{xy}$ ) between 296G alleles of 2L<sup>+</sup> background and *wt* resistance haplotypes of 2L<sup>+</sup> and 2La backgrounds. **D)** Absolute sequence divergence ( $D_{xy}$ ) between 296G alleles of 2La background and *wt* resistance haplotypes of 2L<sup>+</sup> and 2La backgrounds. All values are calculated in windows of 20,000 kbp with 10% overlap.

**Supplementary Material SM15. Genetic differentiation in the 2La inversion.** Differentiation (Hudson's  $F_{ST}$ ) along the 2L chromosomal arm between *A. gambiae* and *A. coluzzii* species, separated by their 2La karyotype (2La/2La or 2L<sup>+</sup>/2L<sup>+</sup>). Panel A shows comparisons with *A. gambiae* with 2L<sup>+</sup>/2L<sup>+</sup> karyotypes, and panel B for *A. gambiae* with 2La/2La karyotypes.  $F_{ST}$  estimates have been calculated in adjacent blocks of 5,000 phased variants with 20% overlap. Sub-panels at the right focus on the *Rdl* genomic locus. Note that interkaryotype comparisons have higher  $F_{ST}$  in the 2La region than inter-species comparisons.

## 646 Bibliography

1. Neafsey DE, Waterhouse RM, Abai MR, Aganezov SS, Alekseyev MA, Allen JE, et al. Highly evolvable malaria  
648 vectors: The genomes of 16 Anopheles mosquitoes. *Science* (80- ). 2015;347:1258522.
2. Miles A, Harding NJ, Bottà G, Clarkson CS, Antão T, Kozak K, et al. Genetic diversity of the African malaria vector  
650 *Anopheles gambiae*. *Nature*. 2017;552:96–100.
3. Clarkson CS, Miles A, Harding NJ, Lucas ER, Battey CJ, Amaya-Romero JE, et al. Genome variation and  
652 population structure among 1,142 mosquitoes of the African malaria vector species *Anopheles gambiae* and  
*Anopheles coluzzii*. *bioRxiv*. Cold Spring Harbor Laboratory; 2019;864314.
- 654 4. Elliott R, Ramakrishna V. Insecticide resistance in *Anopheles gambiae* Giles. *Nature*. 1956;177:532–3.
5. Davidson G. Insecticide resistance in *Anopheles gambiae* Giles: a case of simple mendelian inheritance. *Nature*.  
656 1956;178:863–4.
6. Davidson G, Hamon J. A Case of Dominant Dieldrin Resistance in *Anopheles gambiae* Giles. *Nature*. Nature  
658 Publishing Group; 1962;196:1012–1012.
7. Du W, Awolola TS, Howell P, Koekemoer LL, Brooke BD, Benedict MQ, et al. Independent mutations in the Rdl  
660 locus confer dieldrin resistance to *Anopheles gambiae* and *An. arabiensis*. *Insect Mol Biol*. John Wiley & Sons, Ltd  
(10.1111); 2005;14:179–83.
- 662 8. ffrench-Constant RH, Rocheleau TA, Steichen JC, Chalmers AE. A point mutation in a *Drosophila* GABA receptor  
confers insecticide resistance. *Nature*. 1993;363:449–51.
- 664 9. Thompson M, Steichen JC, ffrench-Constant RH. Conservation of cyclodiene insecticide resistance-associated  
mutations in insects. *Insect Mol Biol*. John Wiley & Sons, Ltd (10.1111); 1993;2:149–54.
- 666 10. Lawniczak MKN, Emrich SJ, Holloway AK, Regier AP, Olson M, White B, et al. Widespread Divergence Between  
Incipient *Anopheles gambiae* Species Revealed by Whole Genome Sequences. *Science* (80- ). American  
668 Association for the Advancement of Science; 2010;330:512–4.
11. Wondji CS, Dabire RK, Tukur Z, Irving H, Djouaka R, Morgan JC. Identification and distribution of a GABA  
670 receptor mutation conferring dieldrin resistance in the malaria vector *Anopheles funestus* in Africa. *Insect  
Biochem Mol Biol*. Pergamon; 2011;41:484–91.
- 672 12. Yang C, Huang Z, Li M, Feng X, Qiu X. RDL mutations predict multiple insecticide resistance in *Anopheles  
sinensis* in Guangxi, China. *Malar J*. 2017;16:482.
- 674 13. ffrench-Constant RH, Anthony N, Aronstein K, Rocheleau T, Stilwell G. Cyclodiene Insecticide Resistance:  
From Molecular to Population Genetics. *Annu Rev Entomol*. Annual Reviews 4139 El Camino Way, P.O. Box 10139,  
676 Palo Alto, CA 94303-0139, USA; 2000;45:449–66.
14. Platt N, Kwiatkowska RM, Irving H, Diabaté A, Dabire R, Wondji CS. Target-site resistance mutations (kdr and  
678 RDL), but not metabolic resistance, negatively impact male mating competitiveness in the malaria vector  
*Anopheles gambiae*. *Heredity* (Edinb). 2015;115:243–52.
- 680 15. Rowland M. Activity and mating competitiveness of gamma HCH/dieldrin resistant and susceptible male and  
virgin female *Anopheles gambiae* and *An. stephensi* mosquitoes, with assessment of an insecticide-rotation strategy.  
682 *Med Vet Entomol*. 1991;5:207–22.
16. Rowland M. Behaviour and fitness of gamma HCH/dieldrin resistant and susceptible female *Anopheles  
gambiae* and *An.stephensi* mosquitoes in the absence of insecticide. *Med Vet Entomol*. 1991;5:193–206.
- 684 17. ffrench-Constant RH, Bass C. Does resistance really carry a fitness cost? *Curr Opin Insect Sci*. Elsevier Inc;



2017;21:39–46.

18. The *Anopheles gambiae* 1000 Genomes Consortium. Ag1000G Phase 2 AR1 data release [Internet]. MalariaGEN. 2017. Available from: <https://www.malariagen.net/data/ag1000g-phase-2-ar1>

19. Coluzzi M. A Polytene Chromosome Analysis of the *Anopheles gambiae* Species Complex. *Science* (80- ). American Association for the Advancement of Science; 2002;298:1415–8.

20. Sturtevant AH. Genetic Factors Affecting the Strength of Linkage in *Drosophila*. *Proc Natl Acad Sci. National Academy of Sciences*; 1917;3:555–8.

21. Andolfatto P, Depaulis F, Navarro A. Inversion polymorphisms and nucleotide variability in *Drosophila*. *Genet Res. Cambridge University Press*; 2001;77:1–8.

22. Kirkpatrick M. How and Why Chromosome Inversions Evolve. *PLoS Biol. Public Library of Science*; 2010;8:e1000501.

23. Ayala FJ, Coluzzi M. Chromosome speciation: humans, *Drosophila*, and mosquitoes. *Proc Natl Acad Sci*. 2005;102 Suppl:6535–42.

24. Davies TGE, Field LM, Usherwood PNR, Williamson MS. A comparative study of voltage-gated sodium channels in the Insecta: implications for pyrethroid resistance in Anopheline and other Neopteran species. *Insect Mol Biol. Wiley/Blackwell* (10.1111); 2007;16:361–75.

25. Clarkson CS, Miles A, Harding NJ, Weetman D, Kwiatkowski D, Donnelly M, et al. The genetic architecture of target-site resistance to pyrethroid insecticides in the African malaria vectors *Anopheles gambiae* and *Anopheles coluzzii*. *BioRxiv*. 2018;

26. Martinez-Torres D, Chandre F, Williamson MS, Darriet F, Berge JB, Devonshire AL, et al. Molecular characterization of pyrethroid knockdown resistance (kdr) in the major malaria vector *Anopheles gambiae* s.s. *Insect Mol Biol. John Wiley & Sons, Ltd* (10.1111); 1998;7:179–84.

27. Clarkson CS, Weetman D, Essandoh J, Yawson AE, Maslen G, Manske M, et al. Adaptive introgression between *Anopheles* sibling species eliminates a major genomic island but not reproductive isolation. *Nat Commun*. 2014;5:4248.

28. Gant DB, Chalmers AE, Wolff MA, Hoffman HB, Bushey D. Fipronil: action at the GABA receptor. In: Kuhr RJ, Motoyama N, editors. *Pestic Futur*. IOS Press; 1998. p. 147–56.

29. Miglianico M, Eldering M, Slater H, Ferguson N, Ambrose P, Lees RS, et al. Repurposing isoxazoline veterinary drugs for control of vector-borne human diseases. *Proc Natl Acad Sci U S A. National Academy of Sciences*; 2018;115:E6920–6.

30. Nakao T, Banba S. Minireview: Mode of action of meta-diamide insecticides. *Pestic Biochem Physiol*. 2015;121:39–46.

31. World Health Organization. Global plan for insecticide resistance management in malaria vectors. World Health Organization; 2012.

32. Fontaine MC, Pease JB, Steele A, Waterhouse RM, Neafsey DE, Sharakhov I V., et al. Extensive introgression in a malaria vector species complex revealed by phylogenomics. *Science* (80- ). 2015;347:1258524.

33. Garud NR, Messer PW, Buzbas EO, Petrov DA. Recent Selective Sweeps in North American *Drosophila melanogaster* Show Signatures of Soft Sweeps. *Copenhaver GP, editor. PLOS Genet. Public Library of Science*; 2015;11:e1005004.

34. Messer PW, Petrov DA. Population genomics of rapid adaptation by soft selective sweeps. *Trends Ecol Evol. Elsevier Ltd*; 2013;28:659–69.

35. Lynd A, Weetman D, Barbosa S, Egyir Yawson A, Mitchell S, Pinto J, et al. Field, Genetic, and Modeling Approaches Show Strong Positive Selection Acting upon an Insecticide Resistance Mutation in *Anopheles gambiae* s.s. *Mol Biol Evol.* 2010;27:1117–25.
36. Stump AD, Pombi M, Goeddel L, Ribeiro JMC, Wilder JA, Torre AD, et al. Genetic exchange in 2La inversion heterokaryotypes of *Anopheles gambiae*. *Insect Mol Biol.* John Wiley & Sons, Ltd (10.1111); 2007;16:703–9.
37. Coluzzi M, Sabatini A, Petrarca V, Di Deco MA. Chromosomal differentiation and adaptation to human environments in the *Anopheles gambiae* complex. *Trans R Soc Trop Med Hyg.* 1979;73:483–97.
38. Cheng C, White BJ, Kamdem C, Mockaitis K, Costantini C, Hahn MW, et al. Ecological Genomics of *Anopheles gambiae* Along a Latitudinal Cline: A Population-Resequencing Approach. *Genetics.* 2012;190:1417–32.
39. Weetman D, Wilding CS, Neafsey DE, Müller P, Ochomo E, Isaacs AT, et al. Candidate-gene based GWAS identifies reproducible DNA markers for metabolic pyrethroid resistance from standing genetic variation in East African *Anopheles gambiae*. *Sci Rep.* Nature Publishing Group; 2018;8:2920.
40. Riehle MM, Bukhari T, Gneme A, Guelbeogo WM, Coulibaly B, Fofana A, et al. The *Anopheles gambiae* 2La chromosome inversion is associated with susceptibility to *Plasmodium falciparum* in Africa. *Elife.* 2017;6.
41. Durand EY, Patterson N, Reich D, Slatkin M. Testing for Ancient Admixture between Closely Related Populations. *Mol Biol Evol.* 2011;28:2239–52.
42. Patterson N, Moorjani P, Luo Y, Mallick S, Rohland N, Zhan Y, et al. Ancient Admixture in Human History. *Genetics.* 2012;192:1065–93.
43. Masiulis S, Desai R, Uchański T, Serna Martin I, Lavery D, Karia D, et al. GABAA receptor signalling mechanisms revealed by structural pharmacology. *Nature.* Nature Publishing Group; 2019;565:454–9.
44. French-Constant RH, Steichen JC, Rocheleau TA, Aronstein K, Roush RT. A single-amino acid substitution in a gamma-aminobutyric acid subtype A receptor locus is associated with cyclodiene insecticide resistance in *Drosophila* populations. *Proc Natl Acad Sci U S A.* National Academy of Sciences; 1993;90:1957–61.
45. Chovnick A. Gene conversion and transfer of genetic information within the inverted region of inversion heterozygotes. *Genetics.* 1973;75:123–31.
46. Rozas J, Aguadé M. Gene conversion is involved in the transfer of genetic information between naturally occurring inversions of *Drosophila*. *Proc Natl Acad Sci U S A.* National Academy of Sciences; 1994;91:11517–21.
47. Ayala D, Zhang S, Chateau M, Fouet C, Morlais I, Costantini C, et al. Association mapping desiccation resistance within chromosomal inversions in the African malaria vector *Anopheles gambiae*. *Mol Ecol.* John Wiley & Sons, Ltd (10.1111); 2019;28:1333–42.
48. Rottschaefer SM, Riehle MM, Coulibaly B, Sacko M, Niaré O, Morlais I, et al. Exceptional Diversity, Maintenance of Polymorphism, and Recent Directional Selection on the APL1 Malaria Resistance Genes of *Anopheles gambiae*. Schneider DS, editor. *PLoS Biol.* Public Library of Science; 2011;9:e1000600.
49. Taylor-Wells J, Brooke BD, Bermudez I, Jones AK. The neonicotinoid imidacloprid, and the pyrethroid deltamethrin, are antagonists of the insect Rdl GABA receptor. *J Neurochem.* John Wiley & Sons, Ltd (10.1111); 2015;135:705–13.
50. Remnant EJ, Morton CJ, Daborn PJ, Lumb C, Yang YT, Ng HL, et al. The role of Rdl in resistance to phenylpyrazoles in *Drosophila melanogaster*. *Insect Biochem Mol Biol.* Pergamon; 2014;54:11–21.
51. Le Goff G, Hamon A, Bergé JJ-B, Amichot M, Goff G Le, Hamon A, et al. Resistance to fipronil in *Drosophila* simulans: influence of two point mutations in the RDL GABA receptor subunit. *J Neurochem.* John Wiley & Sons, Ltd (10.1111); 2005;92:1295–305.

- 768 52. Gielen M, Thomas P, Smart TG. The desensitization gate of inhibitory Cys-loop receptors. *Nat Commun. Nature Publishing Group*; 2015;6:6829.
- 770 53. Lucas ER, Rockett KA, Lynd A, Essandoh J, Grisales N, Kemei B, et al. A high throughput multi-locus insecticide resistance marker panel for tracking resistance emergence and spread in *Anopheles gambiae*. *Sci Rep. Nature Publishing Group*; 2019;9:13335.
- 772 54. Ranson H, N'Guessan R, Lines J, Moiroux N, Nkuni Z, Corbel V. Pyrethroid resistance in African anopheline mosquitoes: what are the implications for malaria control? *Trends Parasitol. Elsevier Current Trends*; 2011;27:91–8.
- 774 55. Macoris M de L, Martins AJ, Andrighetti MTM, Lima JBP, Valle D. Pyrethroid resistance persists after ten years without usage against *Aedes aegypti* in governmental campaigns: Lessons from São Paulo State, Brazil. Kittayapong P, editor. *PLoS Negl Trop Dis. Public Library of Science*; 2018;12:e0006390.
- 776 56. van den Berg H, Zaim M, Yadav RS, Soares A, Ameneshewa B, Mnzava A, et al. Global Trends in the Use of Insecticides to Control Vector-Borne Diseases. *Environ Health Perspect.* 2012;120:577–82.
- 780 57. Giraldo-Calderón GI, Emrich SJ, MacCallum RM, Maslen G, Dialynas E, Topalis P, et al. VectorBase: an updated bioinformatics resource for invertebrate vectors and other organisms related with human diseases. *Nucleic Acids Res.* 2015;43:D707–13.
- 782 58. Miles A, Harding N. *scikit-allel*. 2017.
- 784 59. Rogers AR, Huff C. Linkage disequilibrium between loci with unknown phase. *Genetics. Genetics*; 2009;182:839–44.
- 786 60. Lewontin RC. The Interaction of Selection and Linkage. I. General Considerations; Heterotic Models. *Genetics. Genetics Society of America*; 1964;49:49–67.
61. Bandelt HJ, Forster P, Rohl A. Median-joining networks for inferring intraspecific phylogenies. *Mol Biol Evol.* 1999;16:37–48.
- 790 62. Ellson J, Gansner E, Hu Y, Janssen E, North S. Graphviz - Graph Visualization Software.
- 792 63. Tukey J. Bias and Confidence in Not-quite Large Samples. *Ann Math Stat. Institute of Mathematical Statistics*; 1958;29:614–23.
- 794 64. Pedregosa F, Varoquaux G, Gramfort A, Michel V, Thirion B, Grisel O, et al. Scikit-learn: Machine Learning in Python. *J Mach Learn Res.* 2011;12:2825–30.
- 796 65. Page AJ, Taylor B, Delaney AJ, Soares J, Seemann T, Keane JA, et al. SNP-sites: rapid efficient extraction of SNPs from multi-FASTA alignments. *Microb Genomics. Microbiology Society*; 2016;2.
- 798 66. Nguyen L-TT, Schmidt HA, Von Haeseler A, Minh BQ. IQ-TREE: a fast and effective stochastic algorithm for estimating maximum-likelihood phylogenies. *Mol Biol Evol.* 2015;32:268–74.
- 800 67. Hoang DT, Chernomor O, von Haeseler A, Minh BQ, Vinh LS. UFBoot2: Improving the Ultrafast Bootstrap Approximation. *Mol Biol Evol.* 2018;35:518–22.
- 802 68. Minh BQ, Nguyen MAT, von Haeseler A. Ultrafast approximation for phylogenetic bootstrap. *Mol Biol Evol.* 2013;30:1188–95.
- 804 69. Paradis E, Schliep K. *ape 5.0: an environment for modern phylogenetics and evolutionary analyses in R*. Schwartz R, editor. *Bioinformatics.* 2019;35:526–8.
- 806 70. Wickham H. *stringr: Simple, Consistent Wrappers for Common String Operations*. 2019.
71. Revell LJ. *phytools: an R package for phylogenetic comparative biology (and other things)*. *Methods Ecol Evol.*

- 808 John Wiley & Sons, Ltd (10.1111); 2012;3:217–23.
72. Vicente JL, Clarkson CS, Caputo B, Gomes B, Pombi M, Sousa CA, et al. Massive introgression drives species  
810 radiation at the range limit of *Anopheles gambiae*. *Sci Rep*. 2017;7:46451.
73. Takahata N, Nei M. Gene genealogy and variance of interpopulational nucleotide differences. *Genetics*.  
812 1985;110:325–44.
74. Katoh K, Standley DM. MAFFT multiple sequence alignment software version 7: improvements in  
814 performance and usability. *Mol Biol Evol*. 2013;30:772–80.
75. Charif D, Lobry JR. SeqinR 1.0-2: a contributed package to the R project for statistical computing devoted to  
816 biological sequences retrieval and analysis. In: Bastolla U, Porto M, Roman HE, Vendruscolo M, editors. *Struct  
approaches to Seq Evol Mol networks*, Popul. New York: Springer Verlag; 2007. p. 207–32.
- 818 76. R Core Team. R: A Language and Environment for Statistical Computing. Vienna, Austria; 2017.
77. Paradis E, Claude J, Strimmer K. APE: Analyses of Phylogenetics and Evolution in R language. *Bioinformatics*.  
820 2004;20:289–90.
78. Suyama M, Torrents D, Bork P. PAL2NAL: robust conversion of protein sequence alignments into the  
822 corresponding codon alignments. *Nucleic Acids Res*. 2006;34:W609–12.
79. Kolde R. pheatmap: Pretty Heatmaps. 2019.
- 824 80. Sievers F, Wilm A, Dineen D, Gibson TJ, Karplus K, Li W, et al. Fast, scalable generation of high-quality protein  
multiple sequence alignments using Clustal Omega. *Mol Syst Biol*. 2011;7:539.
- 826 81. Eswar N, Webb B, Marti-Renom MA, Madhusudhan MS, Eramian D, Shen M-Y, et al. Comparative Protein  
Structure Modeling Using Modeller. *Curr Protoc Bioinforma*. 2006;15:5.6.1-5.6.30.
- 828 82. Guex N, Diemand A, Peitsch MC. Protein modelling for all. *Trends Biochem Sci*. Elsevier; 1999;24:364–7.
83. Smart OS, Neduvélil JG, Wang X, Wallace BA, Sansom MSP. HOLE: A program for the analysis of the pore  
830 dimensions of ion channel structural models. *J Mol Graph*. Elsevier; 1996;14:354–60.
84. ChemAxon. ChemAxon [Internet]. 2019 [cited 2019 Dec 6]. Available from: <https://chemaxon.com/>
- 832 85. Morris GM, Huey R, Lindstrom W, Sanner MF, Belew RK, Goodsell DS, et al. AutoDock4 and AutoDockTools4:  
Automated docking with selective receptor flexibility. *J Comput Chem*. 2009;30:2785–91.
- 834 86. Trott O, Olson AJ. AutoDock Vina: Improving the speed and accuracy of docking with a new scoring function,  
efficient optimization, and multithreading. *J Comput Chem*. 2009;31:455–61.
- 836 87. Schrödinger L. The PyMOL Molecular Graphics System, Version 1.8. 2015.
